Noname manuscript No.  
(will be inserted by the editor)

1 **The genetic architecture of local adaptation I: The genomic landscape**  
2 **of foxtail pine (*Pinus balfouriana* Grev. & Balf.) as revealed from a**  
3 **high-density linkage map**

4 **Christopher J. Friedline · Brandon M. Lind · Erin M.**  
5 **Hobson · Douglas E. Harwood · Annette Delfino Mix ·**  
6 **Patricia E. Maloney · Andrew J. Eckert\***

7 Received: date / Accepted: date

8 **Abstract** Explaining the origin and evolutionary dynamics of the genetic architecture of adaptation is  
9 a major research goal of evolutionary genetics. Despite controversy surrounding success of the attempts  
10 to accomplish this goal, a full understanding of adaptive genetic variation necessitates knowledge about

---

C. Friedline  
Department of Biology  
Virginia Commonwealth University  
Richmond, VA 23284  
E-mail: cfriedline@vcu.edu

B. Lind  
Integrative Life Sciences Program  
Virginia Commonwealth University  
Richmond, VA 23284  
E-mail: lindb@vcu.edu

E. Hobson  
Department of Biology  
Virginia Commonwealth University  
Richmond, VA 23284 E-mail: hobsonem@vcu.edu

D. Harwood  
Department of Biology  
Virginia Commonwealth University  
Richmond, VA 23284  
E-mail: harwoodde@vcu.edu

A. Delfino Mix  
Institute of Forest Genetics  
USDA Pacific Southwest Research Station  
Placerville, CA 9566  
E-mail: amix@fs.fed.us

P. Maloney  
Department of Plant Pathology  
University of California  
Davis, CA 95616  
E-mail: pemaloney@ucdavis.edu

A. Eckert (\*Corresponding author)  
Department of Biology  
Virginia Commonwealth University  
Richmond, VA 23284  
E-mail: aeckert2@vcu.edu

the genomic location and patterns of dispersion for the genetic components affecting fitness-related phenotypic traits. Even with advances in next generation sequencing technologies, the production of full genome sequences for non-model species is often cost prohibitive, especially for tree species such as pines where genome size often exceeds 20 to 30 Gbp. We address this need by constructing a dense linkage map for foxtail pine (*Pinus balfouriana* Grev. & Balf.), with the ultimate goal of uncovering and explaining the origin and evolutionary dynamics of adaptive genetic variation in natural populations of this forest tree species. We utilized megagametophyte arrays ( $n = 76\text{--}95$  megagametophytes/tree) from four maternal trees in combination with double-digestion restriction site associated DNA sequencing (ddRADseq) to produce a consensus linkage map covering 98.58% of the foxtail pine genome, which was estimated to be 1276 cM in length (95% CI: 1174 cM to 1378 cM). A novel bioinformatic approach using iterative rounds of marker ordering and imputation was employed to produce single-tree linkage maps (507–17 066 contigs/map; lengths: 1037.40–1572.80 cM). These linkage maps were collinear across maternal trees, with highly correlated marker orderings (Spearman’s  $\rho > 0.95$ ). A consensus linkage map derived from these single-tree linkage maps contained 12 linkage groups along which 20 655 contigs were non-randomly distributed across 901 unique positions ( $n = 23$  contigs/position), with an average spacing of 1.34 cM between adjacent positions. Of the 20 655 contigs positioned on the consensus linkage map, 5627 had enough sequence similarity to contigs contained within the most recent build of the loblolly pine (*P. taeda* L.) genome to identify them as putative homologs containing both genic and non-genic loci. Importantly, all 901 unique positions on the consensus linkage map had at least one contig with putative homology to loblolly pine. When combined with the other biological signals that predominate in our data (e.g., correlations of recombination fractions across single trees), we show that dense linkage maps for non-model forest tree species can be efficiently constructed using next generation sequencing technologies. We subsequently discuss the usefulness of these maps as community-wide resources and as tools with which to test hypotheses about the genetic architecture of adaptation.

**Keywords** Adaptation · double-digestion restriction site associated DNA sequencing · foxtail pine · linkage mapping · *Pinus balfouriana*

## Introduction

Evidence for adaptive evolution among populations of plants is commonly documented at the phenotypic and molecular levels (Kawecki and Ebert 2004; Pannell and Fields 2013), as such some of the best examples of adaptive evolution within lineages come from the field of plant genetics (e.g., Antonovics and Bradshaw 1970). Despite this evidence, relatively little work has focused explicitly on the genomic organization of loci contributing to these patterns (Hoffmann and Riesberg 2008), which likely stems from a lack of genomic

42 resources for plants relative to animals. Adaptive evolution has been extensively documented for forest trees,  
43 especially conifers, with many instances of local adaptation clearly documented over the past century (White  
44 et al. 2007; Neale and Kremer 2011). Despite great advances in experimental technology, empirical focus has  
45 remained almost fully on the number, effect size, type, and interactions among loci contributing to adaptive  
46 evolution (Neale and Kremer 2011; Alberto et al. 2013). A thorough examination of the genetic architecture  
47 of fitness-related traits, however, should also include an examination of the genomic organization of the loci  
48 contributing to trait variation. We leverage this idea in the first of a series of papers dissecting the genetic  
49 architecture of fitness-related traits in a non-model conifer species, foxtail pine (*Pinus balfouriana* Grev. &  
50 Balf.).

51 The genomic organization of loci contributing to variation in fitness-related traits would follow naturally  
52 from the production of a sequenced genome (i.e., a physical map). For many taxa, especially those with  
53 small to modest genome sizes, this is monetarily and computationally feasible using next-generation DNA  
54 sequencing technologies (Koboldt et al. 2013). For taxa with large or complex genomes, however, even the  
55 advent of next generation DNA sequencing does not solve the complexity and cost hurdles associated with  
56 the production of a finished genome sequence. Conifers have large and complex genomes (Murray 1998;  
57 Ahuja and Neale 2005), with estimated average genome sizes in *Pinus* in the range of 20 Gbp to 30 Gbp.  
58 Several genome projects, each of which involves large consortia, are underway or have been completed  
59 (Mackay et al. 2012). Even these efforts often initially result in limited information, however, as for example  
60 the current assemblies of the Norway spruce (*Picea abies* L.) and loblolly pine (*Pinus taeda* L.) genomes  
61 contain millions of unordered contigs with average sizes in the thousands of base pairs (Nystedt et al. 2013;  
62 Neale et al. 2014). An alternative, but not mutually-exclusive, approach to describing the genome of an  
63 organism is that of linkage mapping. In this approach, genetic markers are ordered through observations of  
64 recombination events within pedigrees. This approach dates to the beginning of genetics and the logic has  
65 remained unchanged since the first linkage maps were created in *Drosophila* (Sturtevant 1913).

66 Renewed interest in linkage maps has occurred for two reasons. First, linkage maps are often used to  
67 order contigs created during genome sequencing projects (Mackay et al. 2012; Martinez-Garcia et al. 2013).  
68 In this fashion, linkage maps are used to help create larger contigs from those generated during the assembly.  
69 It is these larger contigs that create the utility that most practicing scientists attribute to genome sequences.  
70 Second, linkage maps are easy to produce and provide a rich context with which to interpret population and  
71 quantitative genetic patterns of variation (e.g., Eckert et al. 2010b,a, 2013; Yeaman 2013). They can also  
72 be used to test explicit hypotheses about the organization of loci contributing to adaptive evolution. For  
73 example, Yeaman and Whitlock (2011) developed theoretical predictions about the genomic organization

of loci underlying patterns of local adaptation as a function of gene flow, so that loci contributing to local adaptation have differing spatial structure within genomes as a result of differing regimes of gene flow. The relevant scale (*sensu* Houle et al. 2011) in these mathematical formulations is that of recombinational distance among loci, so that when matched with an appropriate study system, linkage maps provide the impetus to test basic evolutionary hypotheses. In this context, future additions of finished genome sequences would add to the interpretation of results.

Construction of linkage maps have a long history within forest genetics, mostly through their use in quantitative trait locus mapping (Ritland et al. 2011). Conifers in particular are highly amenable to linkage mapping, with approximately 25 different species currently having some form of linkage map completed (see Table 5-1 in Ritland et al. 2011). Much of the amenability of conifers to linkage mapping stems from the early establishment of breeding populations in economically important species and from the presence of a multicellular female gametophyte (i.e., the megagametophyte) from which the haploid product of maternal meiosis can be observed (Cairney and Pullman 2007). Indeed, many of the first linkage maps in conifers were generated from collections of megagametophytes made from single trees (Tulsieram et al. 1992; Nelson et al. 1993; Kubisiak et al. 1996). Continued advancements in genetic marker technologies have facilitated rapid development of linkage maps across a diversity of species (e.g. Achere et al. 2004; Kang et al. 2010; Martinez-Garcia et al. 2013). The development of biologically informative markers for non-economically important conifers, however, is hampered by production costs associated with the creation of characterized genetic markers (i.e., those with a known DNA sequence and/or function). The majority of this cost is in the two-step approach needed to generate biologically meaningful markers: polymorphism discovery via DNA sequencing followed by genotyping of those polymorphisms (cf., Eckert et al. 2013). As a result, the vast majority of linkage maps outside of economically important species are created with uncharacterized genetic markers (e.g., Travis et al. 1998). Much of the knowledge about the genetic architecture of fitness-related traits, outside of a handful of well studied conifer species, therefore, encompasses the number and effect size of uncharacterized genetic markers (Ritland et al. 2011). Cost restrictions, however, have largely disappeared. It is now feasible to jointly discover polymorphisms and genotype samples using high-throughput DNA sequencing approaches, such as restriction site associated DNA sequencing (RADseq; e.g., Peterson et al. 2012).

The generation of linkage maps from RADseq data is a complex endeavor due to the inherent stochasticity and error prone nature of these data. Recent examples in several crop species highlight the difficulties that must be overcome with respect to missing data and errors in calling polymorphic sites and the resulting genotypes (Pfender et al. 2011; Ward et al. 2013). Despite these difficulties, RADseq has been successively

106 applied to samples taken from natural populations of non-model conifer species (Parchman et al. 2012),  
107 but has yet to be applied to linkage mapping in these species. An exploration of these methods to linkage  
108 mapping in the large and complex genomes of conifers is thus warranted. Here, we take this approach using  
109 megagametophyte arrays from four maternal trees of foxtail pine to generate maternal linkage maps. There  
110 are currently no published linkage maps for this species, which is only distantly related to loblolly pine  
111 (Eckert and Hall 2006), nor any within the subsection *Balfourianae*. We subsequently discuss the utility  
112 of our inferred linkage maps to tests of evolutionary theory addressing local adaptation and its genetic  
113 architecture.

## 114 **Materials and Methods**

### 115 **Focal species**

116 Foxtail pine is a five needle species of *Pinus* classified into subsection *Balfourianae*, section *Parrya*, and  
117 subgenus *Strobos* (Gernandt et al. 2005). It is one of three species within subsection *Balfourianae* (Bailey  
118 1970) and generally is regarded as the sister species to Great Basin bristlecone pine (*P. longaeva* D. K.  
119 Bailey; see Eckert and Hall 2006). The natural range of foxtail pine encompasses two regional populations  
120 located within California that are separated by approximately 500 km: the Klamath Mountains of northern  
121 California and the Sierra Nevada of southern California (Figure 1). These regional populations diverged ap-  
122 proximately one million years ago (mya), with current levels of gene flow between regional populations being  
123 approximately zero (Eckert et al. 2008). Within each regional population, levels of genetic diversity and the  
124 degree of differentiation among local stands differ, with genetic diversity being highest in the southern Sierra  
125 Nevada stands and genetic differentiation being the highest among the Klamath stands (Oline et al. 2000;  
126 Eckert et al. 2008). These two regional populations have also been recognized as distinct subspecies based  
127 on numerous quantitative traits, with *P. balfouriana* subsp. *balfouriana* located in the Klamath region and  
128 *P. balfouriana* subsp. *austrina* located in the southern Sierra Nevada mountains (Mastrogriuseppe and Mas-  
129 trogiuseppe 1980). The two regional populations of foxtail pine thus represent a powerful natural experiment  
130 within which to examine the genomic organization of loci contributing to local adaptation. The first step in  
131 using this system to test evolutionary hypotheses is the production of a dense linkage map (cf., Pannell and  
132 Fields 2013).

### 133 Sampling

134 Seed collections from 141 maternal trees distributed throughout the natural range of foxtail pine were  
135 obtained during 2011 and 2012. Of these 141 maternal trees, 72 were sampled from the Klamath region,  
136 while 69 were sampled from the southern Sierra Nevada region. These 141 families were divided among 15  
137 local stands ( $n = 4$  trees/stand to 17 trees/stand), with eight stands in the Klamath region and seven stands  
138 in the southern Sierra Nevada. Approximately 50 seeds were germinated from each seed collection and 35  
139 of those 50 seedlings were planted in a common garden located at the USDA Institute of Forest Genetics,  
140 Placerville, California (Figure 1). The common garden was established using a randomized block design and  
141 involved three separate plantings of seeds spanning approximately one year (June 6, 2012 until May 20,  
142 2013). Four of the 141 maternal trees were selected at random ( $n = 2$  from the Klamath region and  $n = 2$   
143 from the southern Sierra Nevada) for linkage analysis. Libraries were color-coded and are referred to as red  
144 (southern Sierra Nevada), green (southern Sierra Nevada), blue (Klamath), and yellow (Klamath). For each of  
145 these trees, 75 to 100 seeds were germinated and planted in the common garden. Upon germination, haploid  
146 megagametophyte tissue was rescued from each seedling, cleaned by removing soil and other extraneous  
147 materials with water, and stored for further analysis in 1.5 mL Eppendorf tubes at  $-20^{\circ}\text{C}$ .

### 148 Library Preparation and Sequencing

149 Total genomic DNA was isolated from each rescued megagametophyte using the DNeasy 96 Plant kit following  
150 the manufacturer's protocol (Qiagen, Germantown, MD). RADseq (Davey and Blaxter 2010; Parchman et al.  
151 2012; Peterson et al. 2012) was used to generate a genome-wide set of single nucleotide polymorphism (SNP)  
152 markers for linkage mapping following the protocol outlined by Parchman et al. (2012). In brief, this protocol  
153 is a double-digestion, RADseq (ddRADSeq) approach based on digestion of total genomic DNA using EcoRI  
154 and MseI followed by single-end sequencing on the Illumina HiSeq platform. Single-end sequencing was  
155 chosen for reasons related to cost. Paired-end sequencing would have improved the reference assembly, which  
156 would have likely improved construction of the linkage map. Since the insert size we selected would have  
157 resulted in non-overlapping reads from each end, the improvement to genotype calls is unclear. Following  
158 digestion, adapters containing amplification and sequencing primers, as well as barcodes for multiplexing,  
159 were ligated to the digested DNA fragments. We chose to multiplex 96 samples using the barcodes available  
160 from Parchman et al. (2012). One of these samples, per set of 96, was a pseudo-diploid constructed by  
161 pooling five megagametophytes sampled from the same maternal tree, although there is a probability of  
162  $0.5^4 = 0.0625$  that the genotype for any given SNP will be mistakenly called homozygous due to the five

163 megagametophytes all being of the same allele (see Morris and Spieth 1978). These barcodes are a mixture  
164 of 8 bp, 9 bp, and 10 bp tags that differ by at least four bases. Following ligation, successfully ligated DNA  
165 fragments were amplified using PCR and amplified fragments were size selected using gel electrophoresis. We  
166 selected fragments in the size range of 400 bp (300 bp to 500 bp) by excising and purifying pooled DNA from  
167 2.5% agarose gels using QIAquick Gel Extraction Kits (Qiagen). Further details, including relevant reagents  
168 and oligonucleotide sequences, can be found in File S1. All DNA sequencing was performed on the Illumina  
169 HiSeq 2000 or 2500 platform at the VCU Nucleic Acids Research Facility (<http://www.narf.vcu.edu/>).

## 170 DNA Sequence Analysis

171 There are multiple steps involved with the processing of raw DNA sequence reads into a set of SNP genotypes  
172 that are useful for linkage mapping: (1) quality control, filtering, and demultiplexing, (2) assembly to generate  
173 a reference sequence for mapping reads, (3) mapping of reads to call SNPs and genotypes for each sample,  
174 and (4) filtering of SNPs and the resulting genotypes for data quality and biological meaning.

175 DNA sequence reads were demultiplexed into sample-level fastq files, following quality control and filter-  
176 ing. The filtering pipeline was adapted from Friedline et al. (2012). Briefly, reads containing any N beyond  
177 the first base were excluded, however, reads having N as the first base were shifted by one base to the right  
178 to exclude it (i.e, a read starting with NTGC would become a read starting with TGC). Additional quality  
179 filtering ensured that all reads in the resulting set for downstream processing had a minimum average quality  
180 score of 30 over 5-bp sliding windows and that not more than 20% of the bases had quality scores below 30.  
181 Reads passing the quality control steps were demultiplexed into sample-specific fastq files by exact pattern  
182 matching to known barcodes. Reads that did not match a known barcode were excluded.

183 The individual with the largest number of reads across all four maternal trees was assembled using  
184 Velvet (Zerbino, version 1.2.10), with hash length ( $k$ ) optimized using parameter sweeps of  $k$  through the  
185 contributed VelvetOptimiser (<http://www.vicbioinformatics.com>, version 2.2.5) script (for odd  $k$  on  
186  $k = [19, 63]$ ). Assembly robustness was evaluated in each case using the LAP likelihood framework (Gh-  
187 oodsi et al. 2013), version 1.1 (svn commit r186) following mapping of the original reads to the assembly  
188 with Bowtie2 (Langmead and Salzberg 2012) (`--local --very-sensitive-local`). The assembly with the  
189 maximum likelihood value was chosen as the reference for SNP calling.

190 SNPs were called for all individuals against the reference using the following methodology. First, reads  
191 were mapped to the reference with Bowtie2 (`--local --very-sensitive-local`). These resulting sam files  
192 were converted to their binary equivalent (e.g., bam) using samtools version 0.1.19 (`view, sort, index`)  
193 (Li et al. 2009). SNPs were called using bcftools and filtered using vcfutils to exclude SNPs with less

194 than 100x coverage. The resulting variant call files (vcf) were further processed using `vcftools` version 0.1.11  
195 (Danecek et al. 2011) to remove indels, exclude genotype calls below a quality threshold of 5, and output as  
196 a matrix (`--012`) the haploid genotype of each megagametophyte for each SNP.

197 We used several thresholds to filter called SNPs for linkage mapping. First, we excluded SNPs using a  
198  $\chi^2$  test of homogeneity against an expectation of 1:1 segregation. This segregation pattern was expected  
199 because the maternal tree had to be a heterozygote to detect a SNP, and Mendel's first law guarantees that  
200 the segregation ratio for this SNP should be 1:1. Significance of each test was assessed using a Bonferroni-  
201 corrected significance threshold of  $\alpha = 0.05$ , where  $\alpha$  was corrected using the number of SNPs tested. As reads  
202 from each family were mapped against a single reference assembly, we performed the  $\chi^2$  test and corrections  
203 on a family-wise basis. Second, for each family, we filtered the resulting SNPs based on the genotype of the  
204 pseudo-diploid sample in that family so as to keep only those SNPs where the pseudo-diploid was either 1)  
205 called a heterozygote or 2) had a missing genotype call. Lastly, we filtered the resulting SNPs so as keep  
206 only those that had a minimum of 5 genotype calls for each of the alternate alleles. These filtering steps  
207 were taken to minimize the presence of genotyping errors arising from technical (e.g., read mapping and  
208 alignment) and biological (e.g., paralogy) reasons. Previous research within conifer genomes has documented  
209 to the presence of a large number of paralogues (Keeling et al. 2008; Nystedt et al. 2013; Neale et al. 2014).  
210 Although we did not explicitly quantify the degree of paralogy consistent with our data, the filters used  
211 during the analysis of DNA sequence reads should flag paralogous loci preferentially. The resulting subset of  
212 SNPs was then used as the input to linkage analysis.

### 213 Linkage Analysis

214 The production of a linkage map requires three main steps: (1) calculation of pairwise distances between  
215 all pairs of loci, (2) clustering (i.e., grouping) of loci based on these pairwise distances, and (3) ordering of  
216 loci within each cluster (Cheema and Dicks 2009). A variety of software packages exist to carry out these  
217 steps (e.g., Van Ooijen 2011). Traditional software packages for linkage mapping, however, are not amenable  
218 to large amounts of missing data and frequent errors in genotype calls. The former causes issues with all  
219 aspects of analysis, while the latter primarily affects the genetic distances between markers (Hackett and  
220 Broadfoot 2003; Cartwright et al. 2007). We thus followed the approach of Ward et al. (2013), which was  
221 designed specifically for RADseq data.

222 In brief, this method can be described as follows. Pairwise distances were estimated and loci were clustered  
223 using a custom R script (R Core Team 2013). We used MSTmap (Wu et al. 2008a) to infer marker order  
224 and Maskov (Ward et al. 2013) to impute and correct genotypes. The algorithms available in MSTmap



225 can also be used to impute and correct genotype errors (see Wu et al. 2008a), but the amount of missing  
226 data and putative genotyping errors in our RADseq data far surpassed those used to develop this software.  
227 These two programs were used in an iterative fashion. MSTmap was used initially to order markers, which  
228 was followed by the use of Maskov to impute and correct putative genotype errors conditional on this initial  
229 marker ordering. A last round of ordering was performed using MSTmap conditional on the imputed and error  
230 corrected genotype data. This general schema was followed for each of the four maternal trees independently.

231 The relevant pairwise distance for linkage mapping in our haploid case is defined as the probability  
232 of observing a recombination event between two haplotypes. This probability can be calculated for a set  
233 of biallelic loci using the Hamming distance ( $d_{i,j}$ ). The Hamming distance is the number of differences  
234 separating two binary strings (Hamming 1950), which are in this case, the haploid genotypes for a set of two  
235 megagametophytes. This distance, scaled by the number of positions (i.e.,  $d_{i,j}/n$ ), is the maximum likelihood  
236 estimate of the probability of a recombination event with respect to a pair of haplotypes in a double haploid  
237 design (Wu et al. 2008a). It is also an estimate of the recombination fraction, so that these distances can  
238 be transformed into LOD scores (see Morton 1955). Missing data were dealt with in a pairwise manner, so  
239 that each pairwise comparison had missing data removed prior to estimation of  $d_{i,j}/n$ . When values of  $d_{i,j}/n$   
240 exceeded 0.5, which is the theoretical maximum value given the expected 1:1 segregation pattern, they were  
241 set to 0.5. The  $d_{i,j}/n$  values were used to construct the pairwise distance matrix between all possible pairs  
242 of loci passing our quality thresholds.

243 Loci were clustered hierarchically based on the pairwise distance matrix using Ward's method as the  
244 linkage function (Ward 1963). The values of  $d_{i,j}/n$  were squared prior to use of Ward's method in hierarchical  
245 clustering. We explored groupings ( $K$ ) based on clustering on the interval  $K = [8, 16]$ . This interval was  
246 chosen because it brackets the haploid chromosome number of foxtail pine ( $1N = 12$ ). This entailed cutting  
247 the resulting dendrogram at a specific height, so that the desired number of groups resulted. Solutions were  
248 compared using silhouette widths for each locus (Rousseeuw 1987). The value of  $K$  which maximized the  
249 fraction of loci for which the silhouette width was maximal across the different values of  $K$  was selected as  
250 optimal.

251 Ordering of loci within clusters was carried out using MSTmap (Wu et al. 2008a). This method takes  
252 a full, undirected graph where nodes are loci and edges are based on the values of  $d_{i,j}/n$  and finds the  
253 correct order of markers based on the minimum-weighted traveling salesman path (TSP). Wu et al. (2008a)  
254 showed that the minimum-weighted TSP can be found using a minimum spanning tree approach and that  
255 it corresponds to the correct order of the loci if the minimum spanning tree on the full, undirected graph  
256 is unique. We employed MSTmap using the maximum likelihood objective function, grouping turned off,

257 imputation of missing data turned off, and the Kosambi mapping function (Kosambi 1944). The resulting  
258 ordering of loci within each cluster, along with the distances (i.e., cM) in each cluster, were taken as the  
259 initial linkage map from which data were error-corrected and imputed.

260 Data were subsequently imputed and corrected for errors using Maskov (Ward et al. 2013). A full account  
261 of the mechanics used in the algorithm of Maskov can be found in Text S1 from Ward et al. (2013). For our  
262 purposes, the accuracy of the imputation and error correction depends upon two choices: (1) the threshold  
263 for missing data for a given megagametophyte and (2) the number of contiguous loci where genotype errors  
264 can occur. We chose a value equal to 90% for the amount of missing data across megagametophytes for the  
265 former and a value of 5% of the number of loci in the initial map for each cluster for the latter (cf., Ward  
266 et al. 2013).

267 A final round of ordering was conducted with the imputed and error corrected data using MSTmap as  
268 described previously. Imputation and error correction resulted in many loci where  $d_{i,j}/n = 0$ . These co-  
269 segregating markers were thus mapped to the same bin (Wu et al. 2008a). The collection of resulting ordered  
270 clusters was taken as the final linkage map for each of the four maternal trees. The end result of the linkage  
271 analysis was thus four independent linkage maps, one per maternal tree.

## 272 Consensus Map Construction and Biological Interpretation

273 We took a two-step approach to the inference of the consensus linkage map. First, the four linkage maps, one  
274 for each maternal tree, were combined into a framework linkage map using MergeMap (Wu et al. 2008b).  
275 We constructed a set of weights with which to rank SNP orderings from each map as more or less probable  
276 based on the average amount of missing data, where a higher weight meant that the genotype data used to  
277 infer the linkage map had fewer instances of missing data (red: 0.05, green: 0.40, blue: 0.15, yellow: 0.40).  
278 Second, the remaining SNPs were added to the framework map by using the weighted average of the observed  
279 recombination fractions across libraries and constructing a linkage map as described previously based on these  
280 weighted average values. Consistency in the positioning and relative distances among framework markers  
281 was assessed using Spearman (Spearman 1904) and Mantel (Mantel 1967) correlations. Specifically, pairwise  
282 distances (cM) among framework markers were extracted from each linkage group on the framework map  
283 built using MergeMap as well as the map resulting from use of the weighted average recombination fractions in  
284 MSTmap. A Mantel correlation was used to test the null hypothesis that these distances were not correlated  
285 using a Bonferroni-corrected significance threshold of  $\alpha = 0.05$ . Separate tests were performed for each of  
286 the 12 linkage groups. All analysis was conducted in the R ver. 3.0.2 statistical computing environment (R  
287 Core Team 2013).

288 Framework markers on the resulting consensus linkage map were used to estimate the size (Chakravarti  
289 et al. 1991) and coverage (Lange and Boehnke 1982) of the foxtail pine genome. The contigs from the  
290 assembly used to discover SNPs that appeared on the consensus linkage map were annotated using BLAST  
291 tools (Altschul et al. 1990) and the most recent release of the loblolly pine (*Pinus taeda* L.) genome sequence  
292 (v. 1.01, annotation V2). Each contig from the assembly was queried against the set of scaffolds comprising  
293 the loblolly pine genome using blastn. The hits from each comparison were retained and these top hits were  
294 filtered based on query coverage and the percent identity. As a thresholds, we used a minimum of 50% for the  
295 query coverage and 75% for the percent identity. The percent identity for the query coverage was set according  
296 to the expected number of substitutions between two sequences ( $2\mu t$ , see Nei 1987), where the mutation rate  
297 ( $\mu$ ) was assumed to be  $1 \times 10^{-9}$  substitutions/site/year and the divergence time ( $t$ ) was assumed to be  
298  $8 \times 10^7$  years (Willyard et al. 2007). This translated into an average expectation of 16% divergence between  
299 any two DNA sequences of loblolly and foxtail pines. We rounded down to 75% to account for a portion of  
300 the variance around this expectation. Hits that exceeded these thresholds were transferred as annotations,  
301 as obtained from the annotation gff files, to the contig appearing on the consensus linkage map for foxtail  
302 pine. The resulting GO annotations were visualized and analyzed with ReviGO (Gene Ontology monthly  
303 release 10/2014; UniProt-to-GO mapping 9/30/2014) (Supek et al. 2011) allowing a similarity of 50% across  
304 terms.

## 305 Results

### 306 DNA Sequence Analysis

307 The raw number of reads varied across libraries from a minimum of 71 834 280 (red) to a maximum of  
308 206 365 836 (green), with an average of  $153\,082\,376 \pm 49\,855\,941$ . All raw reads were either 102 bp (green,  
309 yellow) or 110 (red, blue) in length, depending on sequencing technology (HiSeq 2500 vs 2000, respectively).  
310 In general, the libraries run on the Illumina HiSeq 2500 platform had a 1.65-fold greater number of reads  
311 than those run on the Illumina 2000 HiSeq platform. Processing of reads for quality reduced these numbers  
312 by approximately 1.66-fold, with a range of a 2.56-fold (red) to a 1.33-fold (yellow) reduction. After filtering,  
313 the average length of reads was  $88 \pm 13$  bp, with a range of 40 bp to 102 bp across libraries. The number of  
314 quality-filtered reads per megagametophyte also varied 19 741-fold ( $\pm 27\,069$ -fold) on average across libraries,  
315 with average minimums of  $753 \pm 603$  bp to average maximums of  $3\,421\,571 \pm 2\,070\,990$  bp. After quality  
316 filtering this translated into an average total of  $8\,137\,663\,036 \text{ bp} \pm 3\,658\,147\,958 \text{ bp}$  generated per library,  
317 ranging from 2 436 531 265 bp (red) to 11 643 165 529 bp (yellow).

318 The largest number of reads ( $n = 6\,838\,986$ ) were obtained for a single megagametophyte in the green  
319 library. These reads were used to create an assembly against which all other data were mapped for SNP calling  
320 and genotype determination. Optimization of assembly parameters ( $k = 31$ ,  $\ln L = -110.071$ ), resulted in an  
321 assembly of 231 053 contigs, with an average length of 89 bp  $\pm$  12 bp per contig (range: 61 bp to 312 bp), and  
322 an average per-contig base coverage of 4.5 X to 20.0 X (range: 1.5 X to 5069 X). This assembly represented  
323 approximately 0.07% of the genome of foxtail pine, which was assumed to be approximately 30 Gbp in size  
324 (Murray 1998).

325 Using this assembly, 349 542 putative SNPs were called (Table 1). These 349 542 SNPs were located in  
326 83 051 unique contigs (35.94% of the total), with a mean of 4 SNPs per contig (range: 1 to 32). Filtering these  
327 SNPs by expected segregation patterns, consistency with heterozygous calls for the psuedo-diploid sample,  
328 and minimum sample sizes for genotype calls, resulted in 983, 34 261, 21 594, and 35 304 SNPs for the red,  
329 green, blue, and yellow libraries, respectively. The vast majority of SNPs eliminated were for violation of  
330 the 1:1 expected pattern of segregation (259 801 - 268 621), with approximately 95% of these dropped SNPs  
331 shared across families. The counts for the yellow and green libraries were also trimmed so as to remove all but  
332 a handful ( $n = 2$  for the yellow and  $n = 6$  for green libraries) of the unique contigs not found as polymorphic  
333 in the other libraries. This was done to facilitate the efficiency of the calculation of pairwise recombination  
334 fractions. These SNP counts represented 507, 16 925, 10 967, and 17 066 contigs for the red, green, blue,  
335 and yellow libraries, respectively. Patterns of shared polymorphic contigs, as well as SNPs, were as expected  
336 given the among-region magnitude of genetic differentiation (Figure 2, see Eckert et al. 2008), with libraries  
337 comprised of megagametophytes sampled from maternal trees located in the same geographical area sharing  
338 more polymorphic contigs and SNPs than comparisons of maternal trees from different geographical regions  
339 (nonparametric permutation analysis:  $P < 0.0001$ , see Supplemental Text). On average, megagametophytes  
340 in the filtered data set had 79.40% ( $\pm$  14.7%) missing data (i.e., a missing haploid genotype) across SNPs  
341 (range: 1.3% to 99.8%), with the green library having the smallest (74.3%  $\pm$  18.9%) and the red library  
342 having the largest average amount of missing data per megagametophyte (84.4%  $\pm$  15.2%).

### 343 Linkage Mapping

344 Individual linkage maps were constructed for each maternal tree separately using an iterative approach based  
345 on imputation. All filtered SNPs for each maternal tree, regardless of being located in the same contig, were  
346 assessed for patterns of linkage followed by grouping and ordering of SNPs. Redundant SNPs were filtered  
347 *post hoc* and used to test for biases in our analysis pipeline.

348 Grouping of pairwise recombination fractions via hierarchical clustering was consistent with 12 linkage  
349 groups. This corresponded to a minimum pairwise LOD score of approximately 5.5 for each maternal tree  
350 for markers to be placed within the same linkage group. Inspection of the distribution of silhouette values  
351 for values of  $K$  ranging from 8 to 16 revealed that  $K = 12$  was the best clustering solution for each of the 4  
352 maternal trees (Figure S1). This was confirmed by comparison of pairwise LOD scores for SNPs within versus  
353 among the 12 linkage groups. Comparisons within linkage groups were on average 3.2-fold larger than among  
354 linkage groups, which was significantly greater than expected randomly ( $n = 1,000$  permutations/maternal  
355 tree,  $P < 0.015$ ).

356 Marker ordering within putative linkage groups using MSTmap resulted in extremely long linkage maps  
357 (e.g.,  $> 50,000$  cM) for each maternal tree. This translated into an average number of recombination events  
358 which exceeded 100 per megagametophyte. This pattern is consistent with problems of inference due to  
359 missing data and genotyping errors (Ward et al. 2013). To verify this assumption, data for the blue library  
360 were split into two sets of 35 megagametophytes - those with the least amount of missing data and those  
361 with the largest amount of missing data. As expected, the inferred recombination distances were 3.5-fold  
362 smaller for the maps inferred using the megagametophytes with less missing data. Thus, we followed the  
363 approach of Ward et al. (2013) to impute and error correct data based on our initial marker orderings.

364 Imputation and error correction of genotype data for each linkage group for each maternal tree was carried  
365 out using Maskov. This process drastically reduced the number of inferred recombination events, including  
366 double crossovers, from  $> 100$  per megagametophyte to approximately 1 to 2 per megagametophyte. This  
367 reduction was controlled by setting a parameter in Maskov so as to produce a number of recombination  
368 events per megagametophyte that mirrored those observed previously for linkage mapping within conifers  
369 (Eckert et al. 2009; Martinez-Garcia et al. 2013). Changing this parameter had no effect on the downstream  
370 ordering of SNPs within linkage groups, but only changed the spatial resolution of the resulting linkage map.

371 The resulting linkage maps for each maternal tree were aligned manually based on the presence of shared  
372 contigs. Overall, there was excellent agreement among maps, with only 115 SNPs being mapped to conflicting  
373 linkage groups across maternal trees. All 115 SNPs with conflicting group assignments were unique to the  
374 red library. These were dropped from further consideration. Within linkage groups, SNPs present in multiple  
375 libraries were ordered similarly (pairwise Spearman's  $\rho > 0.956$ ,  $P < 0.001$ ), with conflicting orderings  
376 having average differences of 5.91 cM ( $\pm 5.64$  cM). Inferred linkage maps for each maternal tree also resulted  
377 in SNPs from the same contig largely being mapped to the same position, with an average of only 5.8%  
378 of SNPs from the same contig being mapped to a different position. Approximately 94% of the time, these  
379 different positions were adjacent on the linkage map. For those SNPs from the same contig that did not map

380 to the same position, the average difference in positioning was 1.64 cM ( $\pm 3.01$  cM), with no instances of  
381 SNPs from the same contig being located on different linkage groups. We thus pruned multiple SNPs per  
382 contig by randomly selecting one SNP per contig from the data set and re-estimated the linkage maps for  
383 each maternal tree as described previously. The resulting 4 linkage maps were taken as the final estimates  
384 of linkage relationships among polymorphic contigs in each of the 4 maternal trees.

385 The final 4 linkage maps varied in total length from 1037.40 cM to 1572.80 cM, with an average of 1290.29  
386 cM ( $\pm 219.5$  cM; Tables 2, S1-S4; Figures 3, S2-S8). In total, 20 655 unique contigs representing 1 931 700 bp  
387 of DNA were mapped to a position within at least one linkage map. The number of contigs varied 33.66-fold  
388 across linkage maps, with a minimum of 507 (red) to a maximum of 17 066 (yellow). These contigs were  
389 organized into an average of 741 ( $\pm 335$ ) unique positions, separated on average by 1.77 cM ( $\pm 2.36$  cM),  
390 across linkage maps, with the fewest number of unique positions observed in the linkage map for the red  
391 maternal tree ( $n = 296$ ) and the largest number in the linkage map for the blue maternal tree ( $n = 1101$ ).  
392 With respect to average distances between adjacent positions, the linkage map for the red maternal tree had  
393 the largest ( $5.53$  cM  $\pm 6.11$  cM), while that for the blue maternal tree had the lowest ( $1.16$  cM  $\pm 0.77$  cM).  
394 This translated into an average of 15 ( $\pm 27$ ) contigs per position on average, with the linkage map for the  
395 red maternal tree having the fewest contigs per position on average ( $2 \pm 2$ ) and the linkage map for the  
396 yellow maternal tree the most contigs per position on average ( $27 \pm 35$ ). Contigs were also non-randomly  
397 distributed across positions for all linkage maps except that for the red maternal tree ( $P < 0.0001$ , see  
398 Supplemental Text), with elevated contig counts typically occurring at the ends of linkage groups (Figure 3).

### 399 Consensus Map Construction and Biological Interpretation

400 A set of 507 framework SNPs were devised from those contigs shared across at least three of the four  
401 linkage maps. These 507 SNPs were used to construct a framework map using MergeMap. The resulting  
402 linkage map had an overall length of 1572.80 cM. Comparison of this map with those for each maternal  
403 tree revealed a strong similarity in positioning for each linkage group (Spearman's  $\rho > 0.98$ ,  $P < 0.001$ ).  
404 Using an expanded set of SNPs present in at least three families, two of which had to be the green and  
405 yellow families, confirmed these patterns, with pairwise correlations among maps on the order of 0.92 or  
406 greater. Given this overall similarity, we incorporated the remaining markers into the map by using weighted  
407 averages of observed pairwise recombination fractions across maternal trees and inferred a consensus linkage  
408 map as outlined previously. Inferred marker positions and distances for the framework markers were highly  
409 correlated across linkage groups in this map relative to that inferred using MergeMap and only the framework  
410 markers (Mantel's  $r :> 0.95$ ,  $P < 0.001$ ). We used this as evidence in support of our approach and the inferred

411 consensus linkage map was taken as the final consensus estimate of linkage relationships for the 20 655 unique  
412 contigs located in the four maternal tree linkage maps.

413 As with the individual tree maps,  $K = 12$  linkage groups was most consistent with the averaged data. This  
414 corresponded to a minimum pairwise LOD score of approximately 5.5 for each maternal tree for markers  
415 to be placed within the same linkage group. The consensus linkage map was 1192.00 cM in length, with  
416 linkage groups varying in length from 88.44 cM to 108.76 cM (Table S5, Figures 3, S9). There were 901  
417 unique positions across the 12 linkage groups for this map, so that the average number of contigs per  
418 position was  $23 (\pm 35)$ . These 901 positions were separated on average by 1.34 cM ( $\pm 0.50$  cM). As with the  
419 individual maternal tree linkage maps, contigs were non-randomly distributed across positions ( $P < 0.0001$ ,  
420 see Supplemental Text), with notable enrichment at the ends of inferred linkage groups. Using the 507  
421 framework SNPs and the final consensus linkage map, the estimated genome size of foxtail pine is 1276.04  
422 cM (95% confidence interval: 1174.31 - 1377.77 cM). As such, the estimated coverage of the genome is  
423 98.58% (LOD threshold = 5.5, maximum distance among adjacent framework markers: 13.4 cM, number of  
424 framework markers: 507,  $K = 2694$ ).

425 Of the 20 655 contigs in the reference assembly which contained SNPs, 5627 (27.2%) contained BLASTn  
426 hits ( $n = 5853$ ) which passed the filtering threshold of 50% query length and 75% identity. The averages  
427 of query length (bp), query coverage percentage, and identity percentage were  $94 \pm 7$ ,  $86.4\% \pm 13.0\%$ , and  
428  $90.1\% \pm 3.9\%$ , respectively. We found 2802 (48.9%) instances of SNPs mapping to putative genic regions in  
429 the loblolly pine genome ( $n = 587$  scaffolds) representing 303 unique GO terms. More detailed annotation  
430 information (e.g., InterPro IDs and GO terms) can be found in the supplemental file S1.

## 431 Discussion

432 The genetic architecture of fitness-related traits has been a major focus of geneticists for over a century  
433 (reviewed by Ellegren and Sheldon 2008). Early efforts to understand the genetic architecture of fitness-  
434 related traits focused primarily on the number and effect size of the loci underlying heritable, phenotypic  
435 variation (Fisher 1918). Recent work has extended this line of research, with a multitude of studies linking  
436 phenotypic with genetic variation through linkage mapping, both within pedigrees (Mauricio 2001; Neale  
437 and Kremer 2011; Ritland et al. 2011) and within natural populations (Ingvarsson and Street 2011; Eckert  
438 et al. 2013), or through quantitative genetic experimentation (Anderson et al. 2014, 2013; Fournier-Level  
439 et al. 2013). Relatively little empirical work outside of model organisms, other than polyploidization or the  
440 characterization of genomic islands of divergence (e.g., high  $F_{ST}$ ), has focused on the genomic organization  
441 of loci contributing to fitness differences among individuals (but see Stevison et al. 2011). This is despite

442 clear theoretical predictions relating the evolution of the genetic architecture underlying fitness-related traits  
443 to the genomic organization of the loci comprising this architecture (Kirkpatrick and Barton 2006; Yeaman  
444 and Whitlock 2011; Yeaman 2013; Akerman and Burger 2014).

445 Here, we have provided a high-density linkage map representing over 20,000 unique contigs distributed  
446 throughout the 30 Gbp genome of foxtail pine that can be used to aid in the discovery and study of loci  
447 contributing to local adaptation. To our knowledge it represents one of the most dense linkage maps ever  
448 produced within forest trees, although the number of unique positions is much less than the number of mapped  
449 contigs (i.e., about  $1/20^{th}$ ). Approximately 25% of these contigs had significant similarity to sequences within  
450 the draft loblolly pine genome. Importantly, our markers are dispersed in both genic and non-genic regions of  
451 the genome. The latter are often ignored in studies of local adaptation utilizing markers based on sequence  
452 capture (e.g., Neves et al. 2014) and SNP arrays (e.g., Eckert et al. 2010b), yet it is known that non-genic  
453 regions are often involved with adaptation (e.g., Studer et al. 2011). This linkage map, moreover, was created  
454 using affordable next generation sequencing technologies in combination with freely-available methods of  
455 analysis, which highlights the feasibility of this approach to non-model conifers, where full genome sequencing  
456 and assembly are still not quite feasible given realistic research budgets. With regard to map integrity,  
457 recombination fractions for pairs of SNPs segregating in multiple trees were highly correlated (Mantel's  $r$   
458  $> 0.90$  for all comparisons across linkage groups). This allowed for the creation of a robust consensus linkage  
459 map, as well as highlighted the biological signal of linkage apparent even in noisy ddRADseq data. When  
460 coupled with the other biological signals in our results (e.g., trees from the same regional population sharing  
461 SNPs more often), we can be confident that our inferred linkage maps are based primarily on biological, as  
462 opposed to statistical, signals. In further support of this claim, randomly subsampling our data to represent  
463 10 000 contigs and performing linkage mapping as described previously resulted in a consensus linkage map  
464 that was indistinguishable from that pictured in Figure 3 (Spearman's  $\rho = 0.997$ ,  $P < 0.0001$ ).

465 The linkage map produced here is valuable in numerous ways. First, it provides a dense resource for  
466 quantitative trait locus (QTL) mapping. Our next step using this linkage map is to link fitness-related  
467 phenotypic variation with genotypes at mapped markers. We are currently mapping QTLs for  $\delta^{13}C$  to  
468 accomplish this goal (cf., Hausmann et al. 2005). Importantly, this will represent one of the first QTL  
469 maps in the clade of soft pines outside of section *Quinquefoliae*. Second, the framework provided here is  
470 optimal for imputation and phasing of data during population genomic inferences utilizing samples from  
471 natural populations (Scheet and Stephens 2006). Third, our linkage map is the foundation upon which  
472 theoretical expectations can be tested. For example, the theory of Yeaman and Whitlock (2011) predicts  
473 that the loci contributing to local adaptation should be differentially clustered in genomes as a function



474 of rates of gene flow among populations. Magnitudes of gene flow among stands differ dramatically within  
475 the regional populations of foxtail pine, and pairwise plots of synteny across maternal trees revealed several  
476 instances of differential marker orderings between regional populations consistent with areas of the genome  
477 with structural differences (see Figures S7-S8). These areas, however, were the exception, as marker orderings  
478 across trees were highly correlated. Fourth, knowledge about the physical ordering of loci allows patterns  
479 of linkage disequilibrium (LD) within natural populations to be better characterized. The role of LD in  
480 local adaptation has long been recognized (see Akerman and Burger 2014), yet empirical studies of its  
481 role are difficult without some knowledge of physical relationships among loci. This is because LD among  
482 physically linked markers is expected to some degree, whereas LD among physically unlinked markers must  
483 have originated from some evolutionary process (e.g., genetic drift, natural selection, migration). Patterns  
484 of LD across non-genic regions of pine genomes are currently unknown (but see Moritsuka et al. 2012), so  
485 additional data in combination with the linkage map provided here allow for rigorous investigations of these  
486 patterns. Lastly, continued production of linkage maps across the Pinaceae will aid comparative genomics  
487 and evolutionary inference through study of synteny and the evolution of genome structure (Ritland et al.  
488 2011; Pavy et al. 2012).

489 Despite numerous indicators of biological signals dominating our dataset, caution is still needed when  
490 interpreting our results. First, we used novel analysis methods that have not been tested using simulations.  
491 For example, the form of hierarchical clustering used here is not employed to our knowledge in any of the  
492 available software packages used for linkage mapping. Its utility on data of smaller or larger sizes than that  
493 presented here is unknown. Consistency of results across maternal trees, however, indicates that our methods  
494 are likely appropriate for our data (see also Tani et al. 2003). Second, error-correction and imputation were  
495 used, which could have affected marker ordering and distances. Marker order, however, did not change with  
496 increasing stringency of error correction. Only marker distances changed with increased stringency, thus  
497 creating clumped distributions of makers. This was also apparent in the total map length, which is at the  
498 lower end expected for conifers (cf., Ritland et al. 2011), which is indicative of being conservative with error  
499 corrections. The effect of marker clumping on downstream uses of this linkage map, however, is likely to be  
500 minimal (e.g. bias in QTL intervals), as this bias would affect QTL size and not necessarily inference of QTL  
501 presence or absence. The relative importance of imputation and error correction is to some degree affected  
502 by experimental conditions. We did not standardize the total amount of DNA for each megagametophyte  
503 prior to construction of libraries (concentration ranges: 10 ng/ul to >50 ng/ul), which likely affected the  
504 average 19 741-fold variation in the number of reads across megagametophytes. Future studies would benefit  
505 from considering this prior to library construction. Related to this issue was the poor performance of the

red family. In general, the library for this family exhibited signs of low sequence quality, with it having the largest fraction of reads eliminated during quality filtering (Table 1), the largest fraction of pseudo-diploid genotypes called as homozygous or missing (99.5%), and the largest fraction of loci deviating from expected segregation patterns (76.8%). This is consistent with lower overall coverage driven by low quality sequence data, which could have resulted from any of the numerous laboratory steps during creation of the multiplexed libraries (i.e., DNA extractions, restriction digests, ligation, and PCR). Third, we used a form of hierarchical clustering that required the number of groups to be defined subjectively. *Post hoc* analysis indicated that our clustering solution corresponded to a LOD threshold of approximately 5.5 and that 12 was an optimal number of groups (Figure S1). Selection of a larger or smaller number of groups, moreover, did not change marker ordering within groups substantially. Typically, changing  $K$  to a larger value broke existing linkage groups into more pieces, whereas changing  $K$  to smaller values merged existing linkage groups. Marker orderings within these broken or merged groups, however, did not change. Fourth, we did not explicitly quantify error rates. In theory, error rates can be calculated from summaries derived from the mpileup in samtools. Given the relatively low coverage and limited reference assembly for this species (cf., Nystedt et al. 2013; Neale et al. 2014), estimation of error rates would likely be biased. Thus, we preferred to acknowledge the presence of errors, as indicated by the extremely long initial single-tree linkage maps, and use statistical methods to minimize their influence. As next generation data accumulate for this species, and other conifers in general, precise estimation of error rates will become feasible. Lastly, our sample sizes were not large enough to resolve linkage relationships beyond distances of approximately 1.0cM (but see Neves et al. 2014). Increased number of sampled megagametophytes would have allowed higher resolution, which could aid in downstream uses of our linkage map. Despite this level of resolution, however, we have produced one of the densest linkage maps to date for a forest tree species (Eckert et al. 2010a; Martinez-Garcia et al. 2013; Neves et al. 2014).

Conifer genomics is emerging as a mature scientific field (Mackay et al. 2012). Draft sequences of genomes and transcriptomes for several species have been released and more are planned. As shown here, production of high-density linkage maps is a fruitful endeavor to accompany this maturation. The results presented here are promising and also provide guidance for future attempts in additional species. Specifically, linkage maps provide ample information about genomic structure that is needed for the study of local adaptation in natural populations (cf., Limborg et al. 2014). Here, we have produced a high-density linkage map for foxtail pine using methods applicable to any non-model conifer species, thus opening the door for further studies of genome structure and the genetic architecture of local adaptation in this rather understudied clade of pines, as well as the Pinaceae as a whole.

538 **Acknowledgements** The authors would like to thank the staff at the USDA Institute of Forest Genetics, the VCU Nucleic  
539 Acids Research Facility, and the VCU Center for High Performance Computing. In addition, we would like to thank Tom Blush  
540 and Tom Burt for help in obtaining seeds. Funding for this project was made available to AJE via start-up funds from Virginia  
541 Commonwealth University. CJF was supported by the National Science Foundation (NSF) National Plant Genome Initiative  
542 (NPGI): Postdoctoral Research Fellowship in Biology (PRFB) FY 2013 Award #NSF-NPGI-PRFB-1306622.

#### 543 **Data Archiving Statement**

544 Raw short read data are located in the NCBI Short Read Archive (accession number: PRJNA266319). The  
545 linkage map summary files, assembly used for read mapping and SNP calling, and VCF files are given as sup-  
546 porting documents (Files S1 - S3). The consensus linkage map is also available in the Comparative Mapping  
547 Database located at the Dendrome website (accession number: TG151). Source code for this manuscript and  
548 data analyses are located at [http://www.github.com/cfriedline/foxtail\\_linkage](http://www.github.com/cfriedline/foxtail_linkage).

549 **References**

- 550 Achere V, Faivre-Rampant P, Jeandroz S, Besnard G, Markussen T, Aragonés A, Fladung M, Ritter E,  
551 Favre JM (2004) A full saturated linkage map of *Picea abies* including AFLP, SSR, ESTP, 5S rDNA and  
552 morphological markers. *Theoretical and Applied Genetics* 108:1602–1613
- 553 Ahuja MR, Neale DB (2005) Evolution of genome size in conifers. *Silvae Genetica* 54:126–137
- 554 Akerman A, Burger R (2014) The consequences of gene flow for local adaptation and differentiation: a  
555 two-locus two-deme model. *Mathematical Biology* 68:1135–1198
- 556 Alberto FJ, Aitken SN, Alia R, Gonzalez-Martinez SC, Hanninen H, Kremer A, Lefevre F, Lenormand  
557 T, Yeaman S, Whetten R, Savolainen O (2013) Potential for evolutionary responses to climate change -  
558 evidence from tree populations. *Global Change Biology* 19:1645–1661
- 559 Altschul S, Gish W, Miller W, Myers E, Lipman D (1990) Basic local alignment search tool. *Journal of*  
560 *Molecular Biology* 215:403–410
- 561 Anderson JT, Lee CR, Rushworth CA, Colautti RI, Mitchell-Olds T (2013) Genetic trade-offs and conditional  
562 neutrality contribute to local adaptation. *Molecular Ecology* 22:699–708
- 563 Anderson JT, Wagner MR, Rushworth CA, Prasad KVSK, Mitchell-Olds T (2014) The evolution of quan-  
564 titative traits in complex environments. *Heredity* 195:1353–1372
- 565 Antonovics J, Bradshaw AD (1970) Evolution in closely adjacent plant populations VIII. Clinal patterns at  
566 a mine boundary. *Heredity* 25:349–362
- 567 Bailey DK (1970) Phytogeography and taxonomy of *Pinus* subsection *Balfourianae*. *Annals Missouri Botan-*  
568 *ical Garden* 57:210–249
- 569 Cairney J, Pullman GS (2007) The cellular and molecular biology of conifer embryogenesis. *New Phytologist*  
570 176:511–536
- 571 Cartwright DA, Troggio M, Velasco R, Gutin A (2007) Genetic mapping in the presence of genotyping errors.  
572 *Genetics* 176:2521–2527
- 573 Chakravarti A, Lasher LK, Reefer JE (1991) A maximum-likelihood method for estimating genome length  
574 using genetic linkage data. *Genetics* 128:175–182
- 575 Cheema J, Dicks J (2009) Computational approaches and software tools for genetic linkage map estimation  
576 in plants. *Briefings in Bioinformatics* 10:595–608
- 577 Danecek P, Auton A, Abecasis G, Albers CA, Banks E, DePristo MA, Handsaker RE, Lunter G, Marth GT,  
578 Sherry ST, McVean G, Durbin R, 1000 Genomes Project Analysis Group (2011) The variant call format  
579 and VCFtools. *Bioinformatics* 27(15):2156–2158

- 580 Davey JW, Blaxter ML (2010) RADSeq: next-generation population genetics. *Briefings in Functional Ge-*  
581 *nomics* 9:416–423
- 582 Eckert AJ, Hall BD (2006) Phylogeny, historical biogeography, and patterns of diversification for *Pinus*  
583 (Pinaceae): Phylogenetic tests of fossil-based hypotheses. *Molecular Phylogenetics and Evolution* 40:166–  
584 182
- 585 Eckert AJ, Tarse BR, Hall BD (2008) A phylogeographical analysis of the range disjunction for foxtail pine  
586 (*Pinus balfouriana*, Pinaceae): the role of pleistocene glaciation. *Molecular Ecology* 17:1983–1997
- 587 Eckert AJ, Pande B, Ersoz ES, Wright MH, Rashbrook VK, Nicolet CM, Neale DB (2009) High-throughput  
588 genotyping and mapping of single nucleotide polymorphisms in loblolly pine (*Pinus taeda* L.). *Tree Genetics*  
589 *and Genomes* 5:225–234
- 590 Eckert AJ, Bower AD, Gonzalez-Martinez SC, Wegrzyn JL, Coop G, Neale DB (2010a) Back to nature:  
591 ecological genomics of loblolly pine (*Pinus taeda*, Pinaceae). *Molecular Ecology* 19:3789–3805
- 592 Eckert AJ, van Heerwaarden J, Wegrzyn JL, Nelson CD, Ross-Ibarra J, Gonzalez-Martinez SC, Neale DB  
593 (2010b) Patterns of population structure and environmental associations to aridity across the range of  
594 loblolly pine (*Pinus taeda* L., Pinaceae). *Genetics* 185:969–982
- 595 Eckert AJ, Wegrzyn JL, Liechty JD, Lee JM, Cumbie WP, Davis JM, Goldfarb B, Loopstra CA, Palle SR,  
596 Quesada T, Langley CH, Neale DB (2013) The evolutionary genetics of the genes underlying phenotypic  
597 associations for loblolly pine (*Pinus taeda*, Pinaceae). *Genetics* 112:4–12
- 598 Ellegren H, Sheldon BC (2008) Genetic basis of fitness differences in natural populations. *Nature* 452:169–175
- 599 Fisher RA (1918) The correlation between relatives on the supposition of mendelian inheritance. *Transactions*  
600 *of the Royal Society of Edinburgh* 52:399–433
- 601 Fournier-Level A, Wilczek AM, Cooper MD, Roe JL, Anderson J, Eaton D, Moyers BT, Petipas RH, Schaeffer  
602 RN, Pieper B, Reymond M, Koornneef M, Welch SM, Remington DL, Schmitt J (2013) Paths to selection  
603 on life history loci in different natural environments across the native range of *Arabidopsis thaliana*.  
604 *Molecular Ecology* 22:3552–3566
- 605 Friedline CJ, Franklin RB, McCallister SL, Rivera MC (2012) Bacterial assemblages of the eastern Atlantic  
606 Ocean reveal both vertical and latitudinal biogeographic signatures. *Biogeosciences* 9:2177–2193
- 607 Gernandt DS, Lopez GG, Garcia SO, Liston A (2005) Phylogeny and classification of *Pinus*. *Taxon* 54:29–42
- 608 Ghodsi M, Hill CM, Astrovskaya I, Lin H, Sommer DD, Koren S, Pop M (2013) De novo likelihood-based  
609 measures for comparing genome assemblies. *BMC Research Notes* 6:334
- 610 Hackett CA, Broadfoot LB (2003) Effects of genotyping errors, missing values and segregation distortion in  
611 molecular marker data on the construction of linkage maps. *Heredity* 90:33–38

- 612 Hamming RW (1950) Error detecting and error correcting codes. *Bell System Technical Journal* 29:147–160
- 613 Hausmann NJ, Juenger TE, Sen S, Stowe KA, Dawson TE, Simms EL (2005) Quantitative trait loci affecting  
614  $\delta^{13}\text{C}$  and response to differential water availability in *Arabidopsis thaliana*. *Evolution* 59:81–96
- 615 Hoffmann AA, Riesberg LH (2008) Revisiting the impact of inversions in Evolution: From population genetic  
616 markers to drivers of adaptive shifts and speciation. *Annual Review of Ecology, Evolution, and Systematics*  
617 39:21–42
- 618 Houle D, Plabon C, Wagner GP, Hansen TF (2011) Measurement and meaning in biology. *The Quarterly*  
619 *Review of Biology* 86:3–34
- 620 Ingvarsson PK, Street NR (2011) Association genetics of complex traits in plants. *New Phytologist* 189:909–  
621 922
- 622 Kang BY, Mann IK, Major JE, Rajora OP (2010) Near-saturated and complete genetic linkage map of black  
623 spruce (*Picea mariana*). *BMC Genomics* 11:515
- 624 Kawecki TJ, Ebert D (2004) Conceptual issues in local adaptation. *Ecology Letters* 7:1225–1241
- 625 Keeling CI, Weisshaar S, Lin RPC, Bohlmann J (2008) Functional plasticity of paralogous diterpene synthases  
626 involved in conifer defense. *Proceedings of the National Academy of Sciences USA* 105:1085–1090
- 627 Kirkpatrick M, Barton N (2006) Chromosome inversions, local adaptation and speciation. *Genetics* 173:419–  
628 434
- 629 Koboldt DC, Steinberg KM, Larson DE, Wilson RK, Mardis ER (2013) The next-generation sequencing  
630 revolution and its impact on genomics. *Cell* 155:27–38
- 631 Kosambi DD (1944) The estimation of map distance from recombination values. *Annals of Eugenics* 12:172–  
632 175
- 633 Kubisiak TL, Nelson CD, Name WL, Stine M (1996) Comparison of rapid linkage maps constructed for a  
634 single longleaf pine from both haploid and diploid mapping populations. *Forest Genetics* 3:203–211
- 635 Lange K, Boehnke M (1982) How many polymorphic marker genes will it take to span the human genome?  
636 *American Journal of Human Genetics* 128:842–845
- 637 Langmead B, Salzberg SL (2012) Fast gapped-read alignment with Bowtie 2. *Nature Methods* 9:357–359
- 638 Li H, Handsaker B, Subgroup GPDP, 10 (2009) The Sequence Alignment/Map format and SAMtools. *Bioin-*  
639 *formatics* 25:2078–2079
- 640 Limborg MT, Waples RK, Seeb JE, Seeb LW (2014) Temporally isolated lineages of pink salmon reveal unique  
641 signatures of selection on distinct pools of standing genetic variation. *Journal of Heredity* 105:741–751
- 642 Mackay J, Dean JFD, Plomion C, Peterson DG, Canovas FM, Pavy N, Ingvarsson PK, Savolainen O, Guevara  
643 MA, Fluch S, Vinceti B, Abarca D, Diaz-Sala C, Cervera MT (2012) Towards decoding the conifer giga-

- 644 genome. *Plant Molecular Biology* 80:555–569
- 645 Mantel N (1967) The detection of disease clustering and a generalized regression approach. *Cancer Research*  
646 27:209–220
- 647 Martinez-Garcia PJ, Stevens KA, Wegrzyn JL, Liechty J, Crepeau M, Langley CH, Neale DB (2013) Com-  
648 bination of multipoint maximum likelihood (MML) and regression mapping algorithms to construct a  
649 high-density genetic linkage map for loblolly pine (*Pinus taeda* L.). *Tree Genetics and Genomes* 9:1529–  
650 1535
- 651 Mastrogiuseppe RJ, Mastrogiuseppe JD (1980) A study of *Pinus balfouriana* Grev. & Balf. (Pinaceae).  
652 *Systematic Botany* 5:86–104
- 653 Mauricio R (2001) Mapping quantitative trait loci in plants: uses and caveats for evolutionary biology. *Nature*  
654 *Reviews Genetics* 2:370–381
- 655 Moritsuka E, Histaka Y, Tamura M, Uchiyama K, A W, Tsmura Y, Tachida H (2012) Extended linkage  
656 disequilibrium in noncoding regions in a conifer, *Cryptomeria japonica*. *Genetics* 190:1145–1148
- 657 Morris RW, Spieth PT (1978) Sampling strategies for using female gametophytes to estimate heterozygosity  
658 in conifers. *Theoretical and Applied Genetics* 51:217–222
- 659 Morton NE (1955) Sequential tests for the detection of linkage. *American Journal of Human Genetics* 7:277–  
660 318
- 661 Murray BG (1998) Nuclear DNA amounts in gymnosperms. *Annals of Botany* 82:3–15
- 662 Neale DB, Kremer A (2011) Forest tree genomics: growing resources and applications. *Nature Reviews*  
663 *Genetics* 12:111–122
- 664 Neale DB, Wegrzyn JL, Stevens KA, Zimin AV, Puiu D, et al (2014) Decoding the massive genome of loblolly  
665 pine using haploid DNA and novel assembly strategies. *Genome Biology* 15:R59
- 666 Nei M (1987) *Molecular Evolutionary Genetics*. Columbia University Press
- 667 Nelson CD, Nance WL, Doudrick RL (1993) A partial genetic linkage map of slash pine (*Pinus elliotii*  
668 Engelm. var. *elliotii*) based on random amplified polymorphic DNA. *Theoretical and Applied Genetics*  
669 87:145–151
- 670 Neves LG, Davis JM, Barbazuk WB, M K (2014) A high-density gene map of loblolly pine (*Pinus taeda* L.)  
671 based on exome sequence capture genotyping. *G3* 4:29–37
- 672 Nystedt B, Street NR, Wetterbom A, Zuccolo A, Lin YC, et al (2013) The Norway spruce genome sequence  
673 and conifer genome evolution. *Nature* 497:579–584
- 674 Oline DK, Mitton JB, Grant MC (2000) Population and subspecific genetic differentiation in the foxtail pine  
675 (*Pinus balfouriana*). *Evolution* 54:1813–1819

- 676 Pannell JR, Fields PD (2013) Evolution in subdivided plant populations: concepts, recent advances and  
677 future directions. *New Phytologist* 201:417–432
- 678 Parchman TL, Gompert Z, Mudge J, Schilkey FD, Benkman CW, Buerkle CA (2012) Genome-wide associ-  
679 ation genetics of an adaptive trait in lodgepole pine. *Molecular Ecology* 21:2991–3005
- 680 Pavy N, Pelgas B, Laroche J, Rigault P, Isabel N, Bousquet J (2012) A spruce gene map infers ancient plant  
681 genome reshuffling and subsequent slow evolution in the gymnosperm lineage leading to extant conifers.  
682 *BMC Biology* 10:84
- 683 Peterson BK, Weber JN, Kay EH, Fisher HS, Hoekstra HE (2012) Double digest RADseq: An inexpensive  
684 method for de novo SNP discovery and genotyping in model and non-model species. *PLoS ONE* 7:e37,135
- 685 Pfender WF, Saha MC, Johnson EA, Slabaugh MB (2011) Mapping with RAD (restriction-site associated  
686 DNA) markers to rapidly identify QTL for stem rust resistance in *Lolium perenne*. *Theoretical and Applied*  
687 *Genetics* 122:1467–1480
- 688 R Core Team (2013) R: A Language and Environment for Statistical Computing. R Foundation for Statistical  
689 Computing, Vienna, Austria, URL <http://www.R-project.org>
- 690 Ritland K, Krutovsky KV, Tsumura Y, Pelgas B, Isabel N, Bousquet J (2011) Genetic mapping in conifers.  
691 In: Plomion C, Bousquet J, Kole C (eds) *Genetics, Genomics and Breeding of Conifers*, CRC Press, New  
692 York, pp 196–238
- 693 Rousseeuw PJ (1987) Silhouettes: A graphical aid to the interpretation and validation of cluster analysis.  
694 *Journal of Computational and Applied Mathematics* 20:53–65
- 695 Scheet P, Stephens M (2006) A fast and flexible statistical model for large-scale population genotype data:  
696 Applications to inferring missing genotypes and haplotypic phase. *American Journal of Human Genetics*  
697 78:629–644
- 698 Spearman C (1904) The proof and measurement of association between two things. *American Journal of*  
699 *Psychology* 15:72–101
- 700 Stevison LS, Hoehn KB, Noor MAF (2011) Effects of inversions on within- and between-species recombination  
701 and divergence. *Genome Biology and Evolution* 3:830–841
- 702 Studer A, Zhao Q, Ross-Ibarra J, Doebley J (2011) Identificaiton of a functinal transposon insertion in the  
703 maize domestication gene *tb1*. *Nature Genetics* 43:1160–1163
- 704 Sturtevant AH (1913) The linear arrangement of six sex-linked factors in *Drosophila*, as shown by their mode  
705 of association. *Journal of Experimental Zoology* 14:43–59
- 706 Supek F, Bosnjak M, Skunca N, Smuc T (2011) REVIGO summarizes and visualizes long lists of gene  
707 ontology terms. *PLoS ONE* 6(7):e21,800–e21,800



- 708 Tani N, Takahashi T, Iwata H, Mukai Y, Ujino-Ihara T, et al (2003) A consensus linkage map for sugi  
709 (*Cryptomeria japonica*) from two pedigrees, based on microsatellites and expressed sequence tags. *Genetics*  
710 165:1551–1568
- 711 Travis SE, Ritland K, Whitham TG, Keim P (1998) A genetic linkage map of pinyon pine (*Pinus edulis*)  
712 based on amplified fragment length polymorphisms. *Theoretical and Applied Genetics* 97:871–880
- 713 Tulsieram LK, Glaubitz JC, Kiss G, Carlson JE (1992) Singletree genetic linkage mapping in conifers using  
714 haploid DNA from megagametophytes. *Biotechnology* 10:3–34
- 715 Van Ooijen JW (2011) Multipoint maximum likelihood mapping in a full-sib family of an outbreeding species.  
716 *Genetics Research* 93:343–349
- 717 Ward J, Bhangoo J, Fernandez-Fernandez F, Moore P, Swanson J, Viola R, Velasco R, Bassil N, Weber C,  
718 Sargent D (2013) Saturated linkage map construction in *Rubus idaeus* using genotyping by sequencing  
719 and genome-independent imputation. *BMC Genomics* 14:2
- 720 Ward JHJ (1963) Hierarchical grouping to optimize an objective function. *Journal of the American Statistical*  
721 *Association* 58:236–244
- 722 White TL, Adams WT, Neale DB (2007) *Forest genetics*. CABI Publishing, Cambridge
- 723 Willyard A, Syring J, Gernandt D, Liston A, Cronn R (2007) Fossil calibration of molecular divergence in  
724 *Pinus*: inferences for ages and mutation rates. *Molecular Biology and Evolution* 24:90–101
- 725 Wu Y, Bhat PR, Close TJ, Lonardi S (2008a) Efficient and accurate construction of genetic linkage maps  
726 from the minimum spanning tree of a graph. *PLoS Genetics* 4:e1000212
- 727 Wu Y, Close TJ, Lonardi S (2008b) On the accurate construction of consensus genetic maps. *Computational*  
728 *Systems and Bioinformatics Conference* 7:285–296
- 729 Yeaman S (2013) Genomic rearrangements and the evolution of clusters of locally adaptive loci. *Proceedings*  
730 *of the National Academy of Sciences USA* 110:E1743–E1751
- 731 Yeaman S, Whitlock MC (2011) The genetic architecture of adaptation under migration-selection balance.  
732 *Evolution* 65:1897–1911

**Table 1** Attributes of the data structure related to maternal tree.

| Attribute          | Yellow      | Blue        | Red           | Green         |
|--------------------|-------------|-------------|---------------|---------------|
| Region             | Klamath     | Klamath     | Sierra Nevada | Sierra Nevada |
| Latitude           | 44.7483     | 41.1959     | 36.4481       | 36.4481       |
| Longitude          | -123.1332   | -122.7922   | -118.1706     | -118.1706     |
| Illumina Platform  | HiSeq 2500  | HiSeq 2000  | HiSeq 2000    | HiSeq 2500    |
| # Megagametophytes | 95          | 95          | 76            | 73            |
| Reads (total)      | 174 516 834 | 159 612 555 | 71 834 280    | 206 365 836   |
| Reads (filtered)   | 131 540 433 | 80 498 688  | 28 041 978    | 129 396 774   |

**Table 2** Attributes of single-tree and the consensus linkage maps. Values for ratio variables are totals and are not averaged across linkage groups (see Tables S1–S5).

| Attribute         | Yellow    | Blue      | Red     | Green     | Consensus |
|-------------------|-----------|-----------|---------|-----------|-----------|
| Contigs           | 17066     | 10967     | 507     | 16925     | 20655     |
| Positions         | 728       | 1101      | 296     | 839       | 901       |
| Contigs/position  | 23        | 10        | 2       | 20        | 23        |
| Total bp mapped   | 1 596 325 | 1 025 088 | 47 222  | 1 583 269 | 1 931 700 |
| Total length (cM) | 1037.40   | 1263.46   | 1572.80 | 1287.48   | 1192.10   |
| cM/position       | 1.43      | 1.15      | 5.31    | 1.53      | 1.32      |

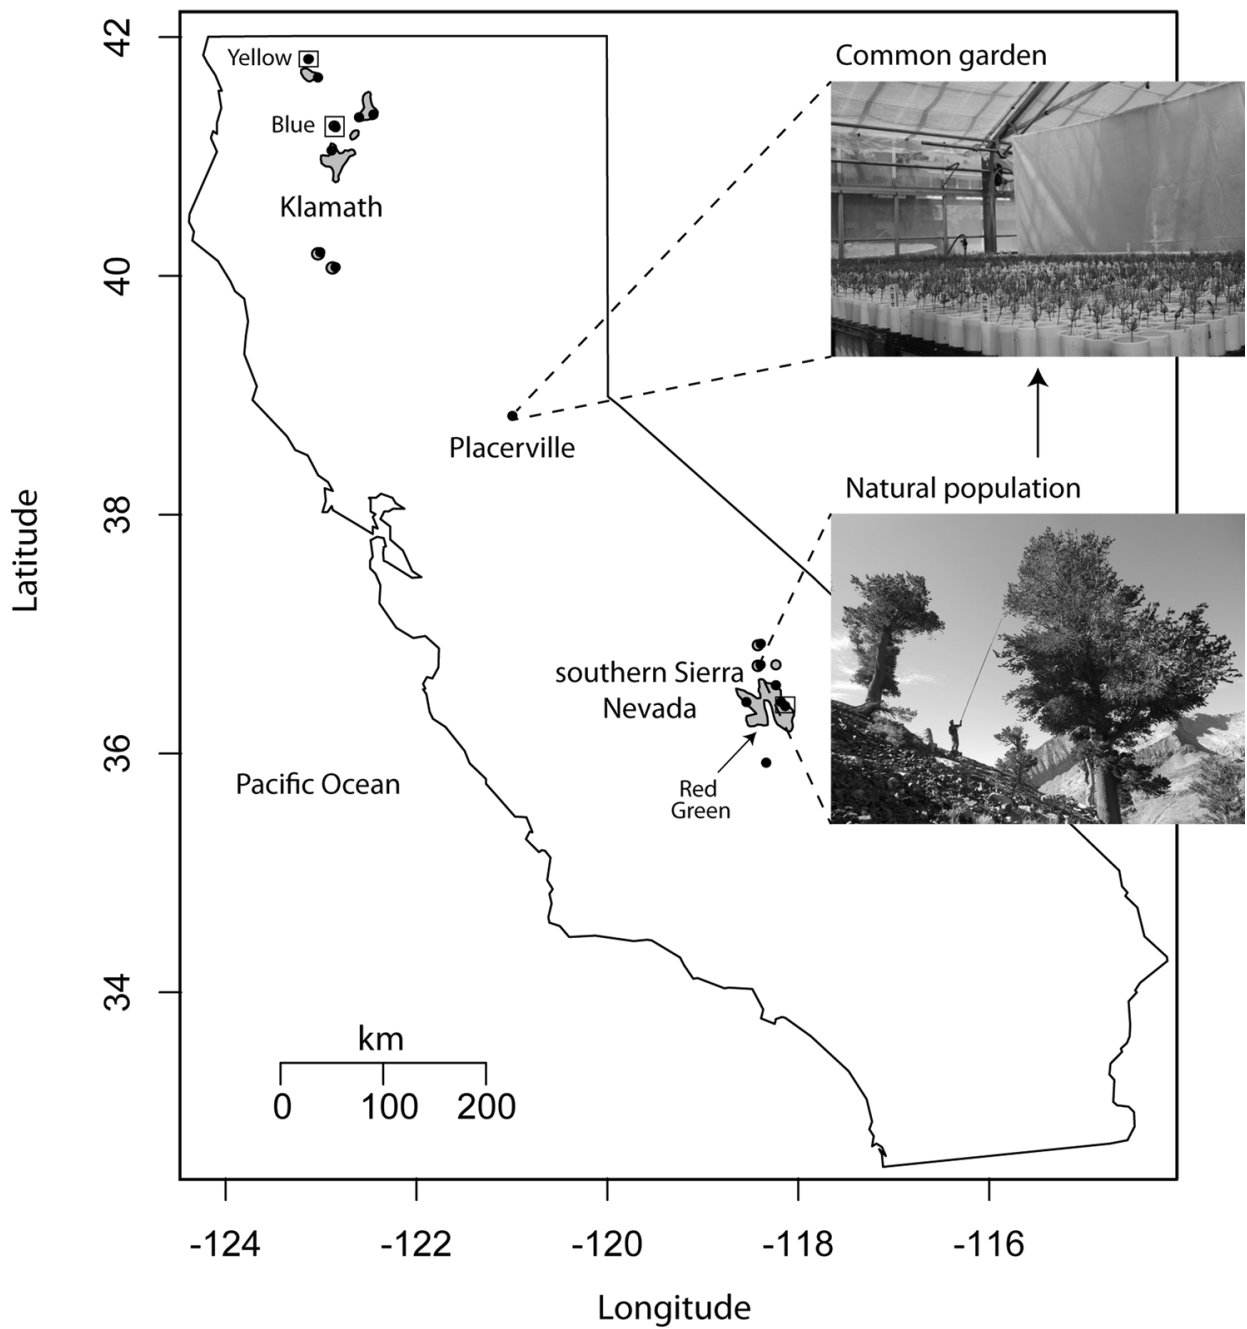

**Fig. 1** Geographical locations of foxtail pine samples used to construct a common garden located in Placerville, CA. Circles denote the 15 unique locations from which 4 to 17 maternal trees were sampled. Circles enclosed in squares denote locations from which maternal trees used in linkage mapping were sampled. Photo credits: lower: T. Burt; upper: A. Delfino Mix

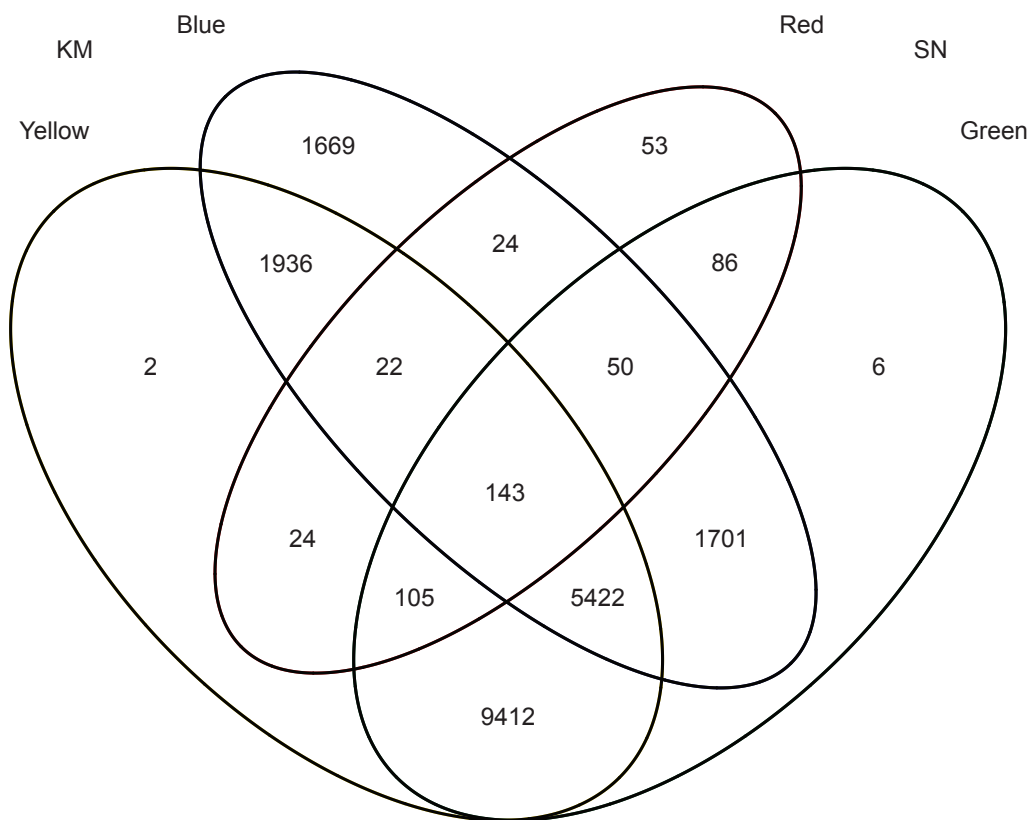

**Fig. 2** Sharing of contigs across maternal tree maps from which the consensus map was constructed. Counts in each cell represent the number of unique contigs appearing on the final consensus map. Unique contigs for the yellow and green maternal trees were largely discarded to make estimation of pairwise recombination fractions computationally feasible (see Materials and Methods). KM = Klamath Mountains; SN = Sierra Nevada.

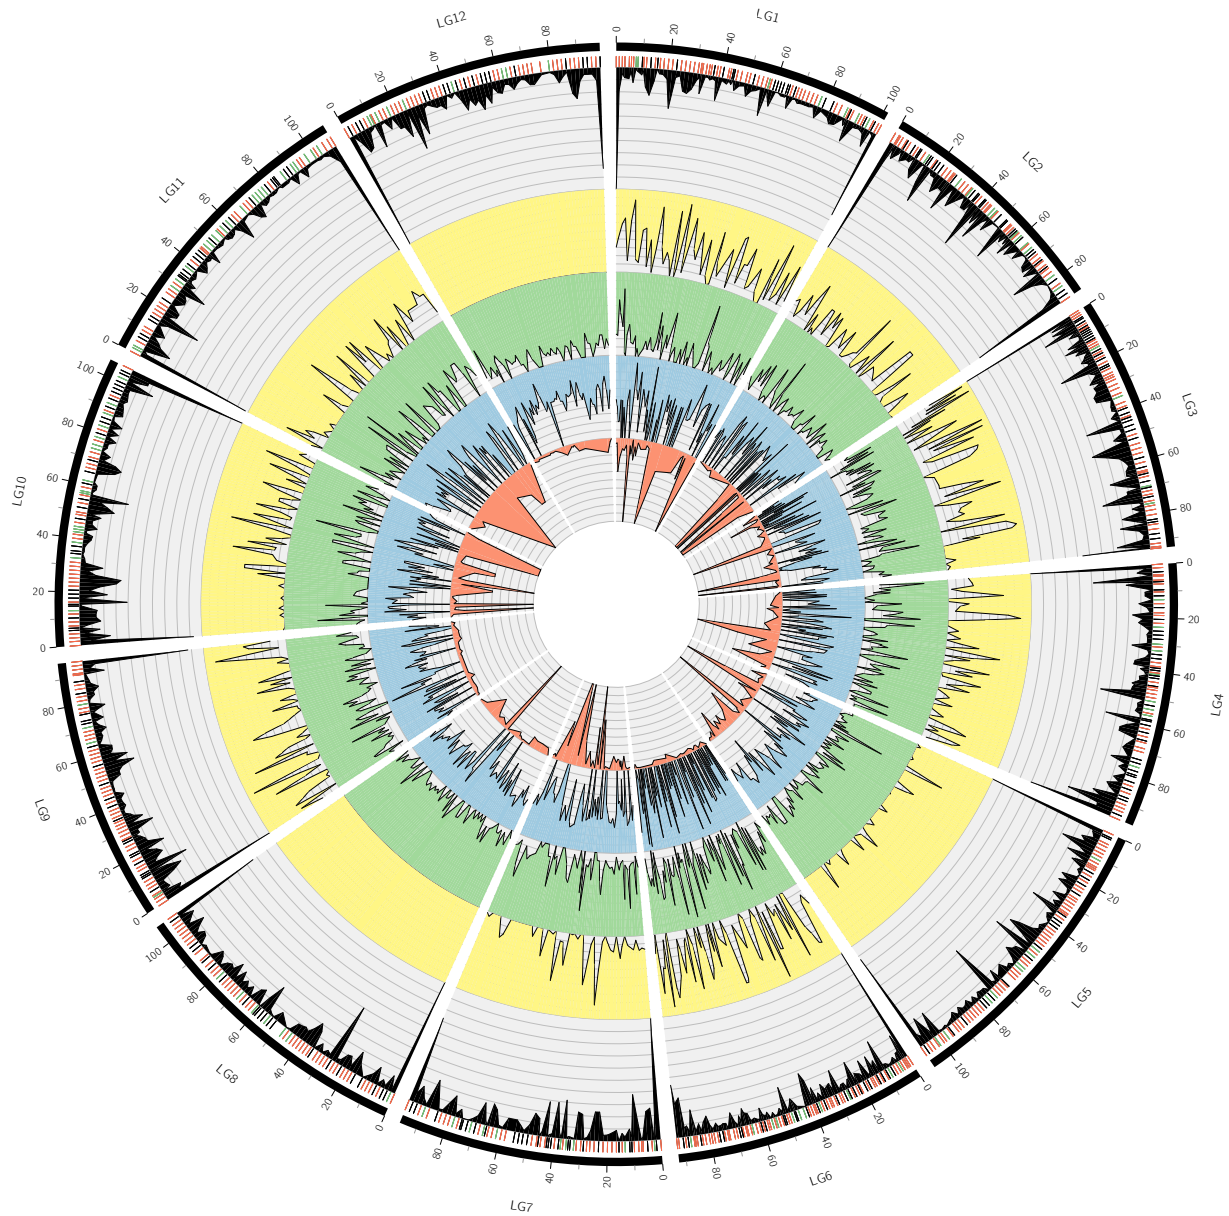

**Fig. 3** Consensus linkage map of 12 linkage groups, derived from SNPs among individuals of four populations. Working inward from the outermost section of the figure, for each linkage group: (1) the solid black bars represent the span of recombination distances (in centiMorgan) for markers; (2) the individual tick marks show the locations of the markers and the colors represent the density of annotation of the SNPs at that position ( $\geq 50\%$  = green,  $\geq 25\%$  = red,  $< 25\%$  = black) to homologous locations in lobolly pine); (3) The black density plot represents the counts of SNPs from all four families mapping to a specific position in the linkage group; (4) the colored density plots show the contribution SNPs from the individual families to the markers on the map at each position, and are shown in order by total read count in the library, with yellow having the most and red having the least amount of reads. Linear plots of linkage groups comprising the consensus map are given in Figure S9.

## 733 **Supplementary Materials**

### 734 **Supplementary Text**

735 A nonparametric permutation analysis was used to test the hypothesis that sharing of polymorphic contigs  
736 was greater between maternal trees located in the same regional population. The null hypothesis in this case  
737 is that the degree of sharing between trees in the same regional population is not different than between trees  
738 in different regional populations. To conduct this test, we constructed a null distribution of the difference  
739 between mean within versus mean between levels of contig sharing. This distribution was based on permuta-  
740 tions, where each permutation consisted of randomly sampling with replacement contigs from the full set of  
741 contigs prior to filtering for each maternal tree identifier. The number of each contigs for each maternal tree  
742 identifier was equal to that observed in the original dataset. Given these assignments, the degree of sharing  
743 (DS) between trees was calculated as:

$$744 \quad \text{DS} = \text{number of contigs shared} / \text{number of unique contigs in the pairwise comparison}$$

745 Given four maternal trees, there are 6 pairwise comparisons, of which there are 2 within regional pop-  
746 ulation and 4 between regional population comparisons. Using these pairwise values, we constructed a test  
747 statistic defined as the difference between the mean within regional population value of DS and the mean  
748 between regional population value of DS. We simulated 10 000 values of this test statistic to form the null  
749 distribution and rejected the null hypothesis when the observed test statistic fell in the upper 95% tail of  
750 this null distribution (i.e., a one-tailed test). Using this approach, the observed test statistic was 0.06337814.  
751 The limits of the simulated null distribution were -0.0349 to 0.0415. Thus the observed test statistic fell  
752 completely outside the upper tail of the null distribution, which gives  $P < 0.0001$ .

753 The spatial distribution of contigs along linkage groups was tested against complete spatial randomness  
754 using simulations. Specifically, we used the variance in the observed number of contigs mapped to each  
755 unique position across the entire linkage map as the test statistic. The null distribution of the test statistic  
756 was created by simulating 10 000 Poisson-distributed variables, each with the number of random values equal  
757 to the number of unique positions on the linkage map under consideration and the mean equal to the mean  
758 number of contigs per position. For each Poisson-distributed variable, the variance was calculated. The set  
759 of 10000 variances was used as the null distribution expected under complete spatial randomness. A separate  
760 null distribution was constructed for each maternal tree. If the observed variance fell in either the 2.5% or  
761 97.5% tail of the null distribution, the null hypothesis was rejected. For example, the values used for the  
762 consensus linkage map were: observed variance = 1245.423, average expected variance of Poisson-distributed

763 variable = 23 with 95% CI of null expectation of 20.915–25.246, and limits of the null distribution of 19.214–  
764 27.655. The  $P$ -value for the observed variance is thus  $P < 0.0001$ .

765 This test does not explicitly test spatial randomness of the unique positions on a linkage map, but rather  
766 tests the assumption that the intensities (i.e., the number of mapped contigs) at each position follow a Poisson  
767 distribution. This approach was chosen because distances in the inferred linkage maps were sensitive to the  
768 error correction and imputation. Of course, the number of contigs at each mapped position is also sensitive  
769 to this process, although relaxing the error correction parameter in Maskov resulted in similar results for a  
770 range of values that resulted in realistic linkage map lengths (i.e., total lengths  $< 3000$  cM). Thus, we were  
771 confident that this result is not only a function of error correction and imputation. All linkage maps except  
772 for the single-tree map from the red maternal tree had greater than expected variances across positions in  
773 counts of mapped contigs relative to the null model of a Poisson-distributed variable.



774 Supplementary Tables

**Table S1** Attributes of the single-tree linkage by linkage group (LG) for the yellow maternal tree (Klamath).

| Attribute | No. contigs | No. positions | Contigs/position | Total bp mapped | Total length (cM) | cM/position |
|-----------|-------------|---------------|------------------|-----------------|-------------------|-------------|
| LG1       | 1394        | 59            | 24               | 130 466         | 85.17             | 1.44        |
| LG2       | 1518        | 52            | 29               | 142 195         | 71.07             | 1.37        |
| LG3       | 1174        | 50            | 23               | 110 032         | 69.35             | 1.39        |
| LG4       | 879         | 58            | 15               | 82 151          | 86.87             | 1.50        |
| LG5       | 2046        | 79            | 26               | 191 663         | 109.62            | 1.39        |
| LG6       | 1893        | 51            | 37               | 176 401         | 67.97             | 1.33        |
| LG7       | 1681        | 56            | 30               | 157 609         | 79.47             | 1.42        |
| LG8       | 1863        | 70            | 27               | 173 888         | 97.32             | 1.39        |
| LG9       | 1480        | 63            | 23               | 138 205         | 86.86             | 1.38        |
| LG10      | 872         | 68            | 13               | 81 645          | 97.32             | 1.43        |
| LG11      | 578         | 61            | 9                | 54 056          | 101.42            | 1.66        |
| LG12      | 1688        | 61            | 28               | 158 014         | 84.96             | 1.39        |

**Table S2** Attributes of the single-tree linkage by linkage group (LG) for the blue maternal tree (Klamath).

| Attribute | No. contigs | No. positions | Contigs/position | Total bp mapped | Total length (cM) | cM/position |
|-----------|-------------|---------------|------------------|-----------------|-------------------|-------------|
| LG1       | 1085        | 128           | 8                | 101 420         | 112.69            | 0.88        |
| LG2       | 982         | 81            | 12               | 91 963          | 102.56            | 1.27        |
| LG3       | 1306        | 113           | 12               | 121 886         | 103.84            | 0.92        |
| LG4       | 610         | 85            | 7                | 57 028          | 96.18             | 1.13        |
| LG5       | 904         | 76            | 12               | 84 711          | 108.75            | 1.43        |
| LG6       | 1769        | 129           | 14               | 165 198         | 108.89            | 0.84        |
| LG7       | 879         | 89            | 10               | 82 216          | 101.30            | 1.14        |
| LG8       | 805         | 66            | 12               | 75 042          | 108.89            | 1.65        |
| LG9       | 1001        | 98            | 10               | 93 821          | 98.76             | 1.01        |
| LG10      | 470         | 93            | 5                | 44 024          | 108.90            | 1.17        |
| LG11      | 365         | 84            | 4                | 34 052          | 111.42            | 1.33        |
| LG12      | 791         | 59            | 13               | 73 727          | 101.28            | 1.72        |

**Table S3** Attributes of the single-tree linkage by linkage group (LG) for the red maternal tree (Sierra Nevada).

| Attribute | No. contigs | No. positions | Contigs/position | Total bp mapped | Total length (cM) | cM/position |
|-----------|-------------|---------------|------------------|-----------------|-------------------|-------------|
| LG1       | 100         | 26            | 4                | 9388            | 123.44            | 4.75        |
| LG2       | 24          | 16            | 2                | 2205            | 47.54             | 2.97        |
| LG3       | 50          | 34            | 1                | 4642            | 134.27            | 3.95        |
| LG4       | 34          | 18            | 2                | 3202            | 133.33            | 7.41        |
| LG5       | 50          | 40            | 1                | 4631            | 169.48            | 4.24        |
| LG6       | 35          | 19            | 2                | 3191            | 136.74            | 7.20        |
| LG7       | 65          | 43            | 2                | 6059            | 135.49            | 3.15        |
| LG8       | 30          | 18            | 2                | 2814            | 125.48            | 6.97        |
| LG9       | 37          | 22            | 2                | 3428            | 143.35            | 6.52        |
| LG10      | 38          | 33            | 1                | 3511            | 166.06            | 5.03        |
| LG11      | 16          | 10            | 2                | 1501            | 108.08            | 10.81       |
| LG12      | 28          | 17            | 2                | 2650            | 149.54            | 8.80        |

**Table S4** Attributes of the single-tree linkage by linkage group (LG) for the green maternal tree (Sierra Nevada).

| Attribute | No. contigs | No. positions | Contigs/position | Total bp mapped | Total length (cM) | cM/position |
|-----------|-------------|---------------|------------------|-----------------|-------------------|-------------|
| LG1       | 1568        | 71            | 22               | 146 650         | 108.83            | 1.53        |
| LG2       | 1520        | 57            | 27               | 142 272         | 110.77            | 1.94        |
| LG3       | 1444        | 73            | 20               | 135 159         | 114.08            | 1.56        |
| LG4       | 911         | 64            | 14               | 85 200          | 108.98            | 1.70        |
| LG5       | 1811        | 73            | 25               | 169 546         | 76.83             | 1.05        |
| LG6       | 2157        | 80            | 27               | 201 113         | 100.04            | 1.25        |
| LG7       | 1597        | 74            | 22               | 149 767         | 114.34            | 1.55        |
| LG8       | 1663        | 71            | 23               | 155 356         | 123.28            | 1.74        |
| LG9       | 1457        | 73            | 20               | 136 192         | 96.47             | 1.32        |
| LG10      | 805         | 73            | 11               | 75 315          | 101.80            | 1.39        |
| LG11      | 553         | 70            | 8                | 51 843          | 121.49            | 1.74        |
| LG12      | 1439        | 60            | 24               | 134 856         | 110.57            | 1.84        |

**Table S5** Attributes of the consensus linkage by linkage group (LG).

| Attribute | No. contigs | No. positions | Contigs/position | Total bp mapped | Total length (cM) | cM/position |
|-----------|-------------|---------------|------------------|-----------------|-------------------|-------------|
| LG1       | 1938        | 80            | 24               | 181 309         | 101.64            | 1.27        |
| LG2       | 1837        | 73            | 25               | 172 031         | 88.44             | 1.21        |
| LG3       | 1977        | 77            | 26               | 184 680         | 93.10             | 1.21        |
| LG4       | 1108        | 73            | 15               | 103 585         | 96.23             | 1.32        |
| LG5       | 2068        | 82            | 25               | 193 722         | 107.35            | 1.31        |
| LG6       | 2843        | 96            | 30               | 265 356         | 92.59             | 0.96        |
| LG7       | 1871        | 70            | 27               | 175 272         | 96.22             | 1.37        |
| LG8       | 1863        | 70            | 27               | 173 888         | 107.16            | 1.53        |
| LG9       | 1818        | 71            | 26               | 169 974         | 95.89             | 1.35        |
| LG10      | 956         | 76            | 13               | 89 477          | 106.06            | 1.40        |
| LG11      | 687         | 71            | 10               | 64 299          | 108.76            | 1.53        |
| LG12      | 1689        | 62            | 27               | 158 107         | 98.56             | 1.60        |

775 Supplementary Figures

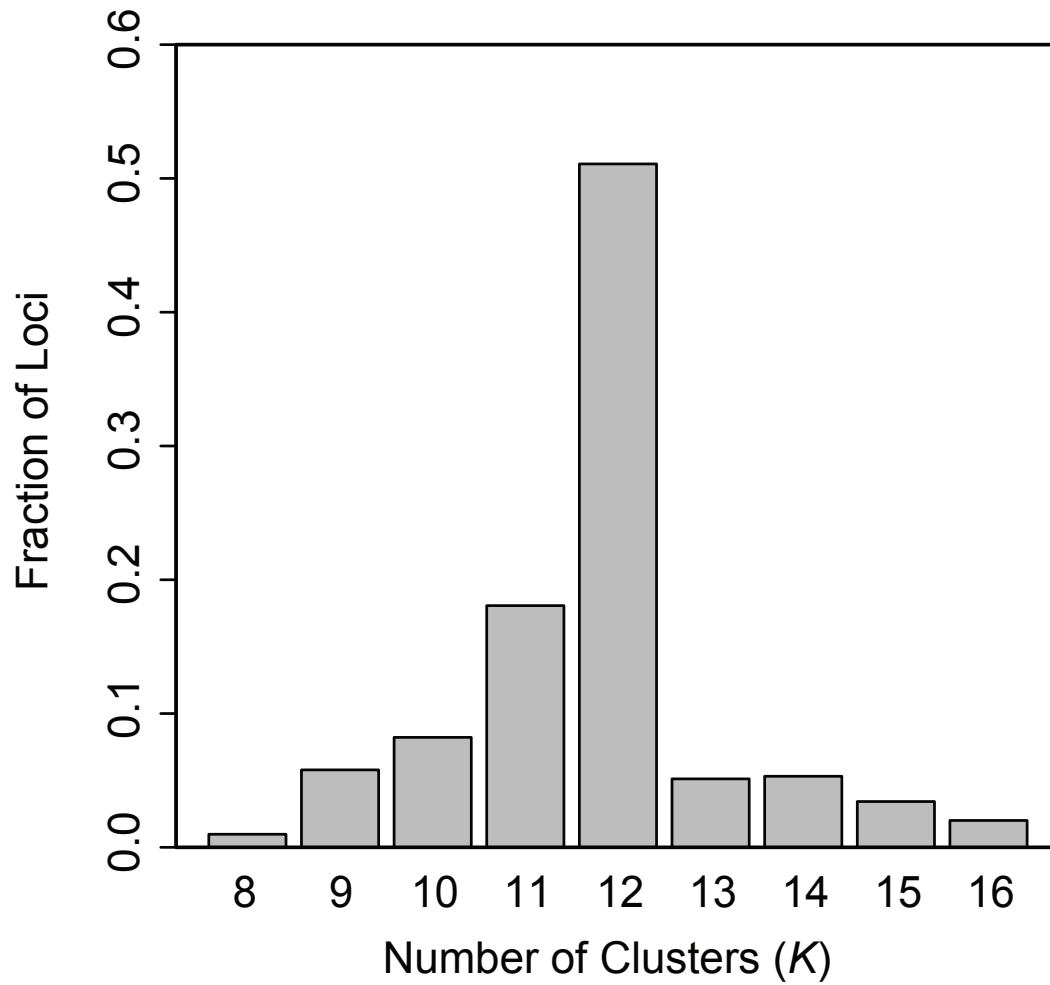

**Fig. S1** The fraction of loci with silhouette values being maximal at each value of  $K$  reveals that  $K = 12$  is an optimal clustering solution. For each locus, the maximum silhouette value was determined and the fraction of loci with maximal values at each value of  $K$  was plotted. These results are for the yellow maternal tree. Results for the other single-tree, as well as consensus linkage map were qualitatively similar with pronounced peaks at  $K = 12$ .

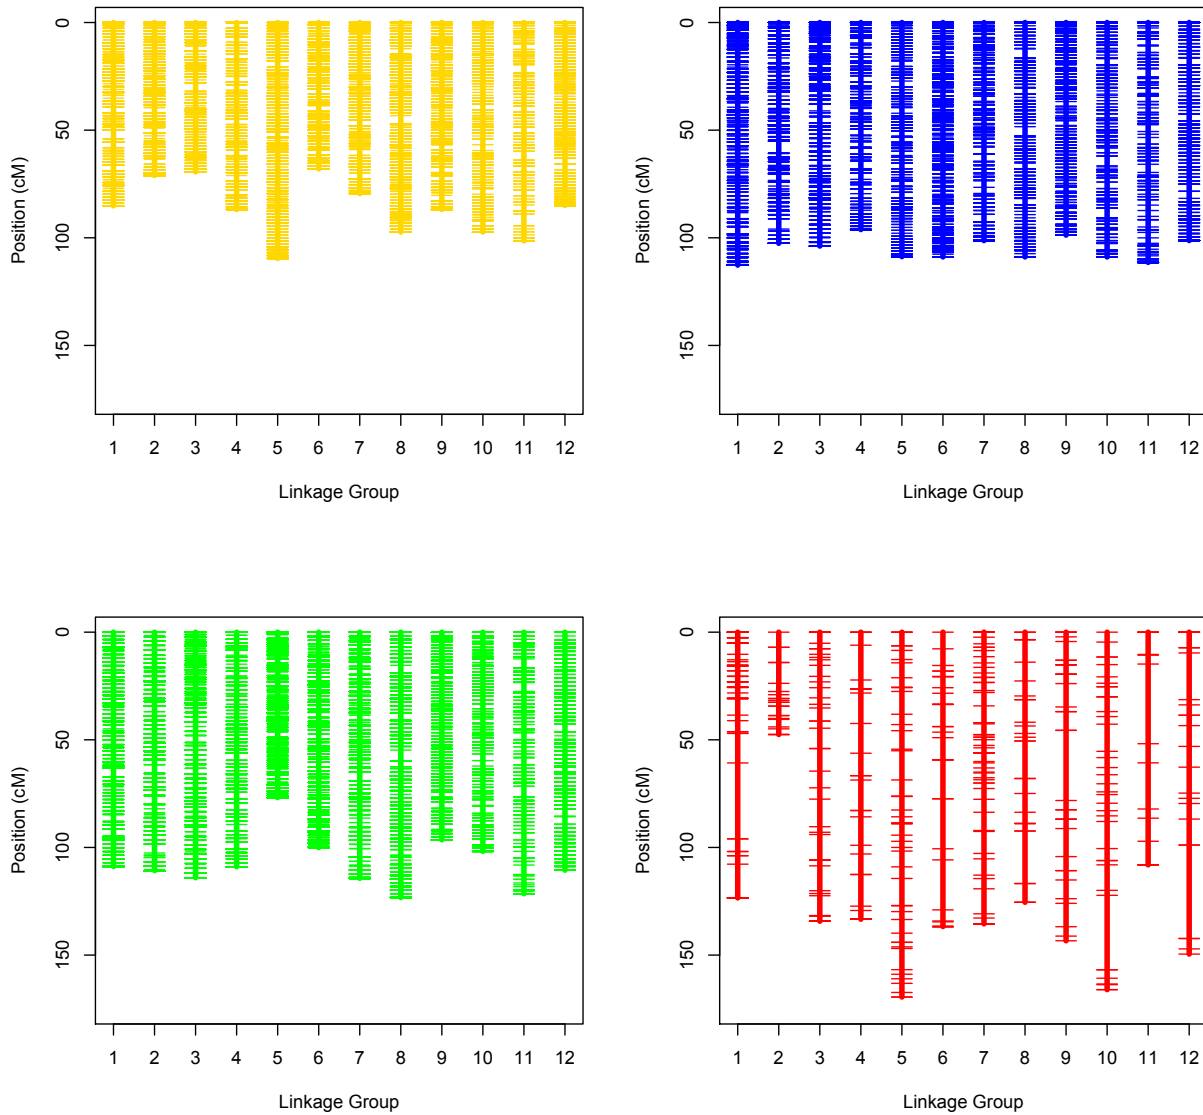

**Fig. S2** Single-tree linkage maps. Maps are color coded and organized by regional population (top row: Klamath; bottom row: southern Sierra Nevada)

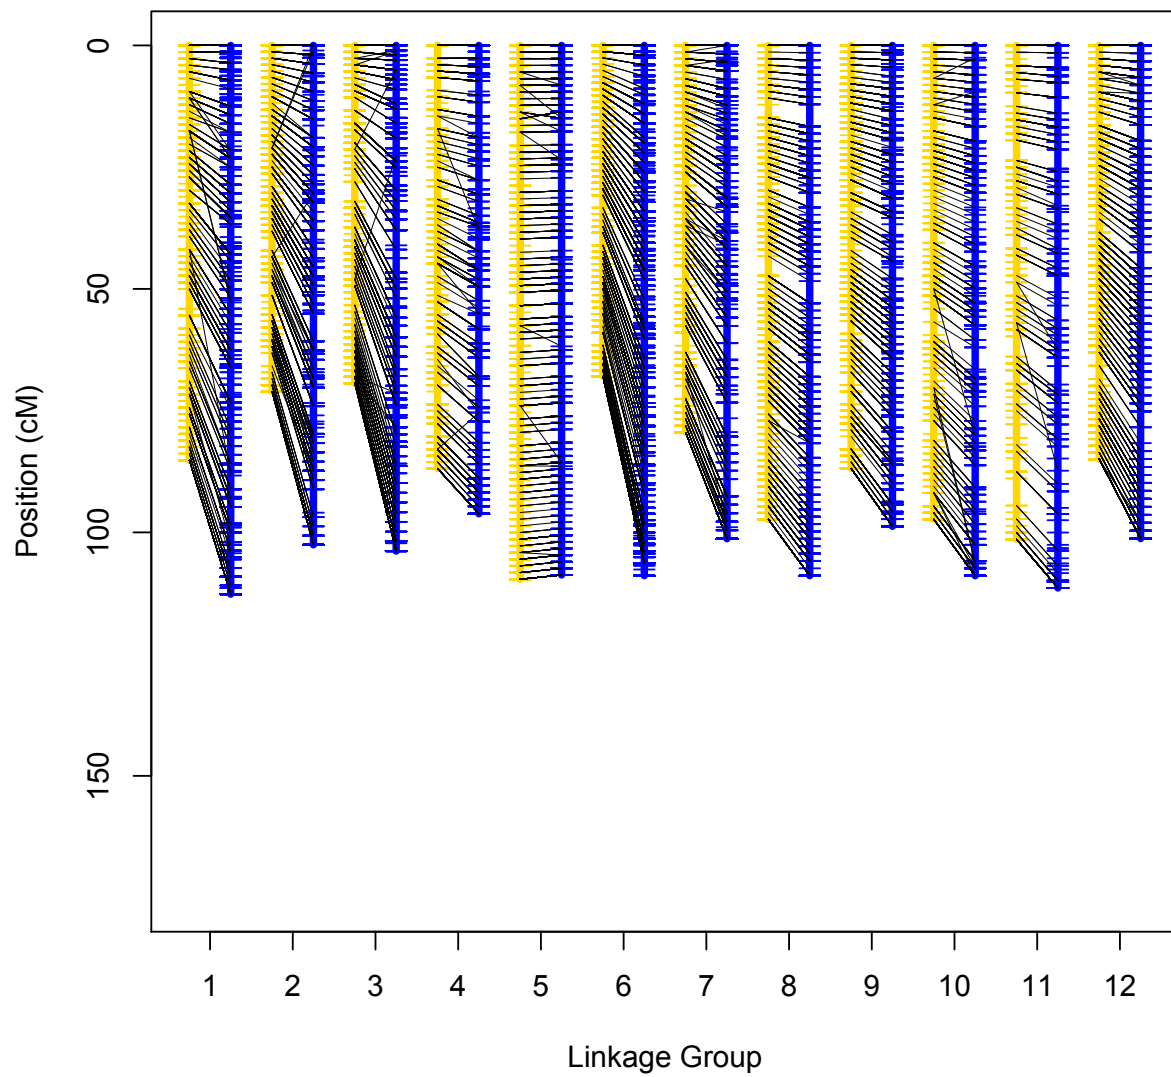

**Fig. S3** Pairwise synteny plots between the yellow and blue maternal trees. Both trees are from the Klamath region.



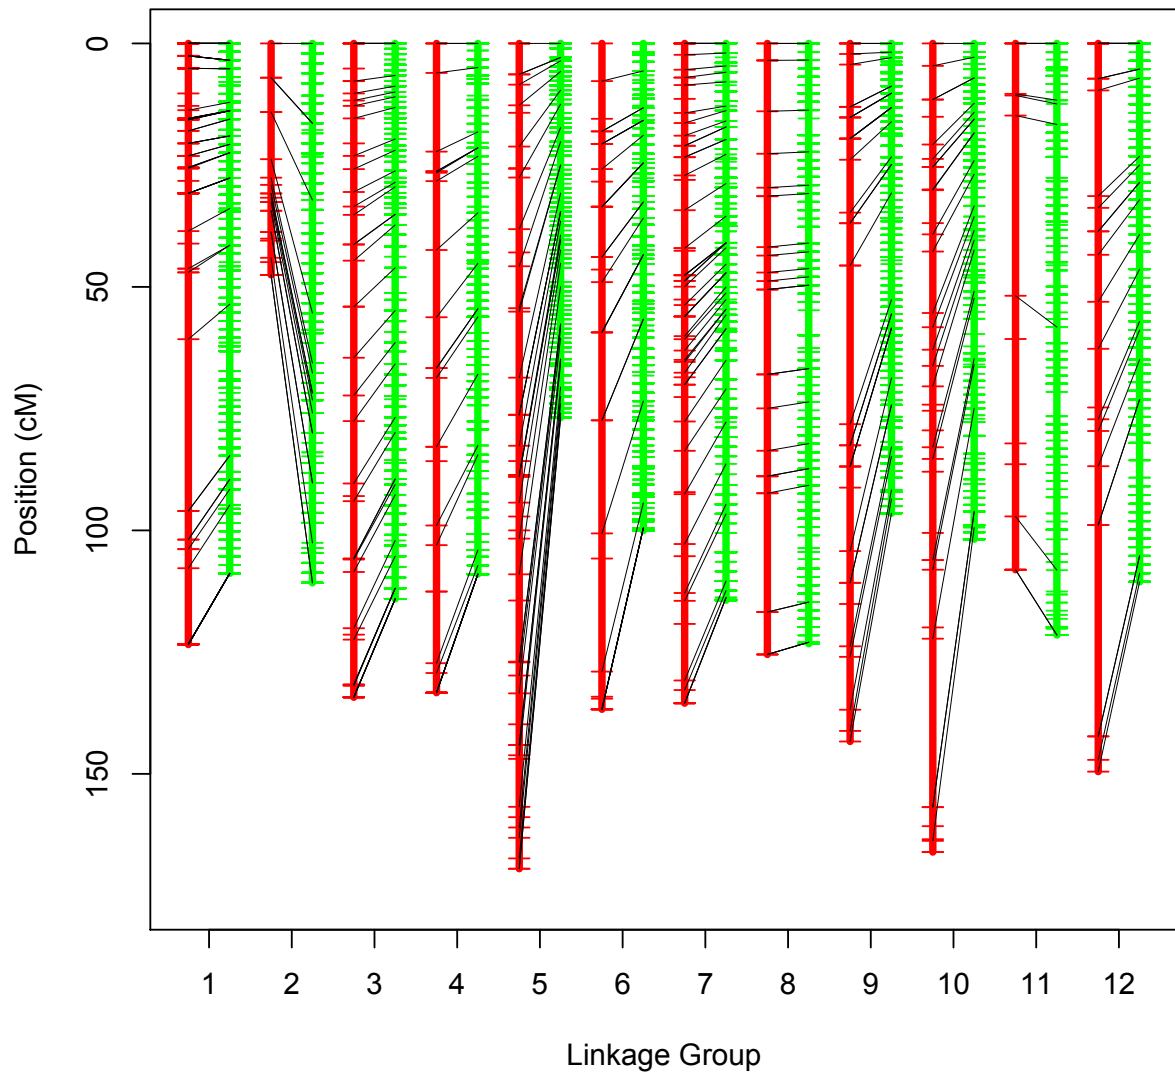

**Fig. S4** Pairwise synteny plots between the green and red maternal trees. Both trees are from the southern Sierra Nevada region.

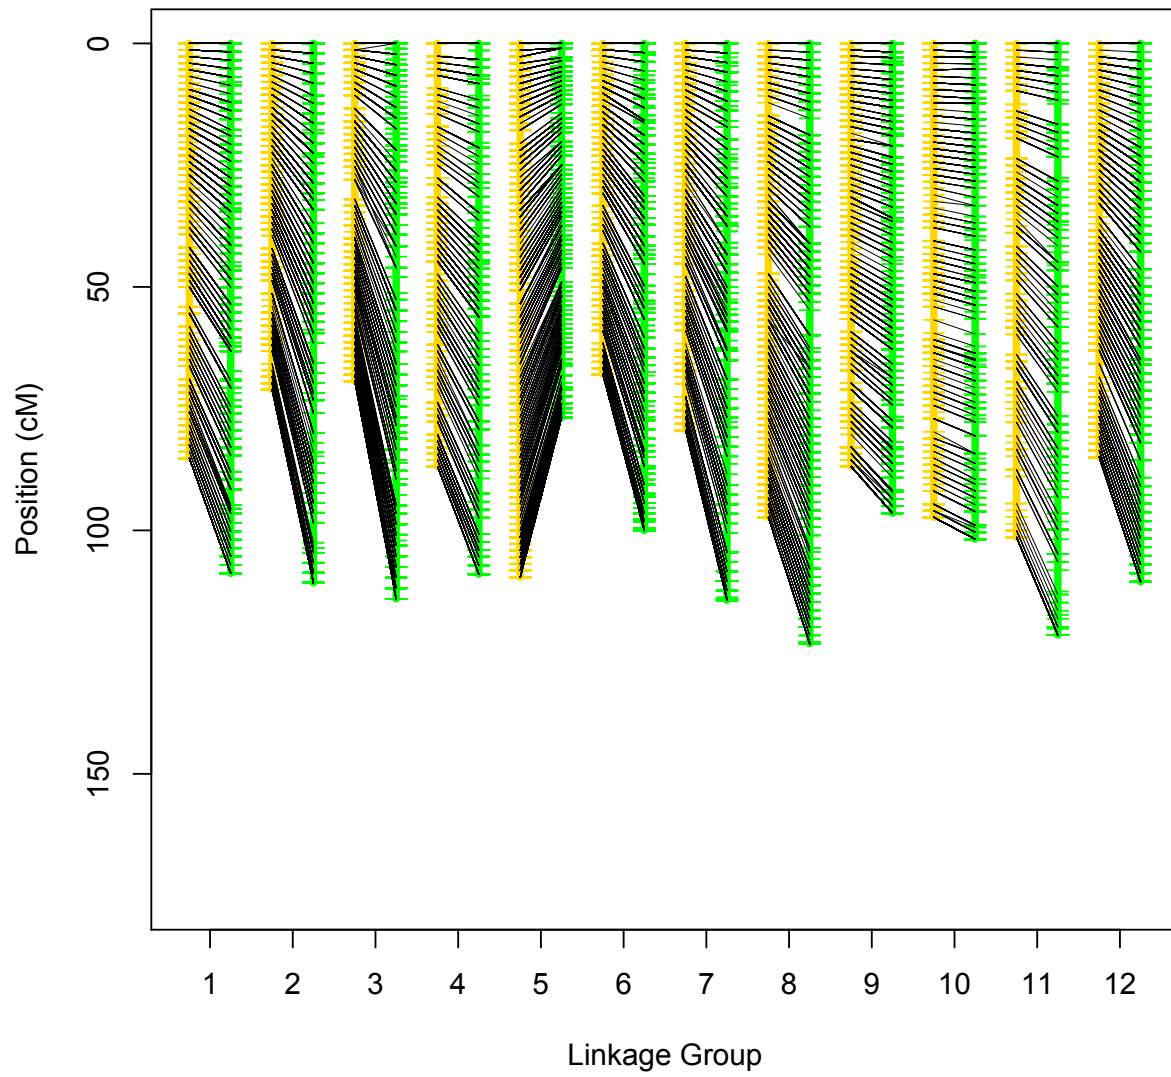

**Fig. S5** Pairwise synteny plots between the yellow (Klamath) and green (southern Sierra Nevada) maternal trees.

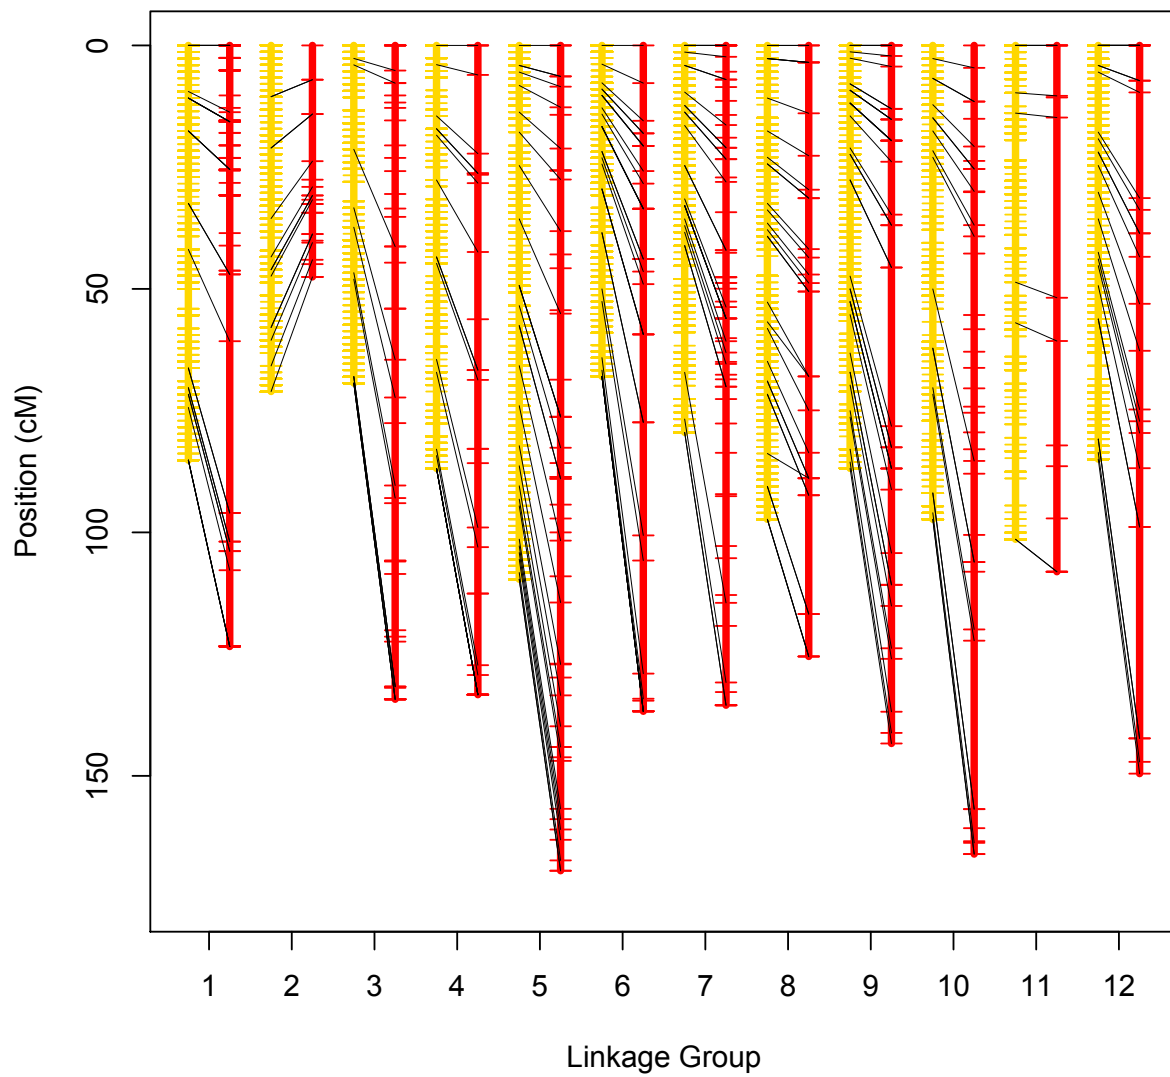

**Fig. S6** Pairwise synteny plots between the yellow (Klamath) and red (southern Sierra Nevada) maternal trees.

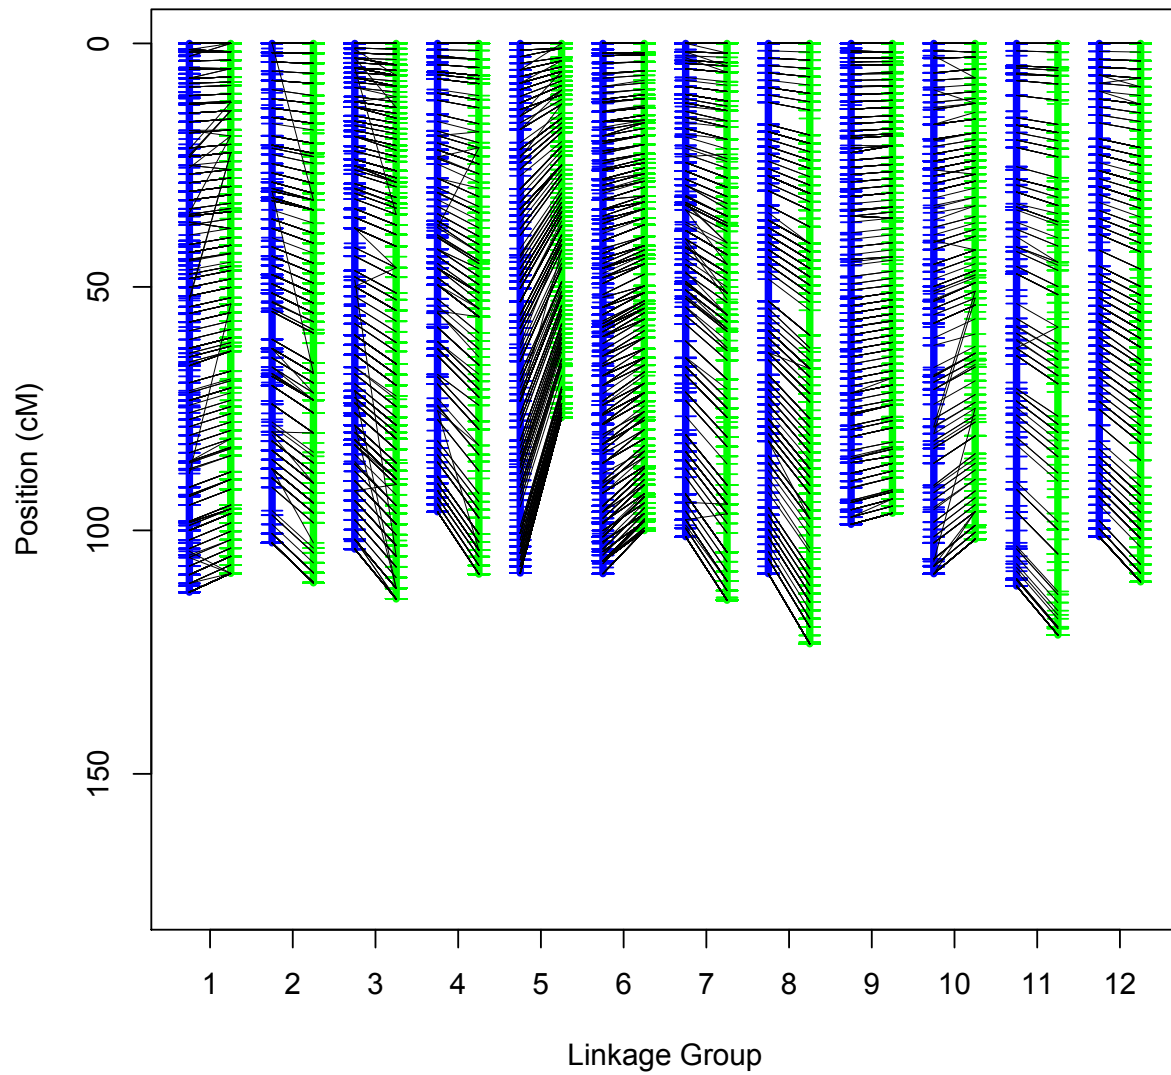

**Fig. S7** Pairwise synteny plots between the blue (Klamath) and green (southern Sierra Nevada) maternal trees.

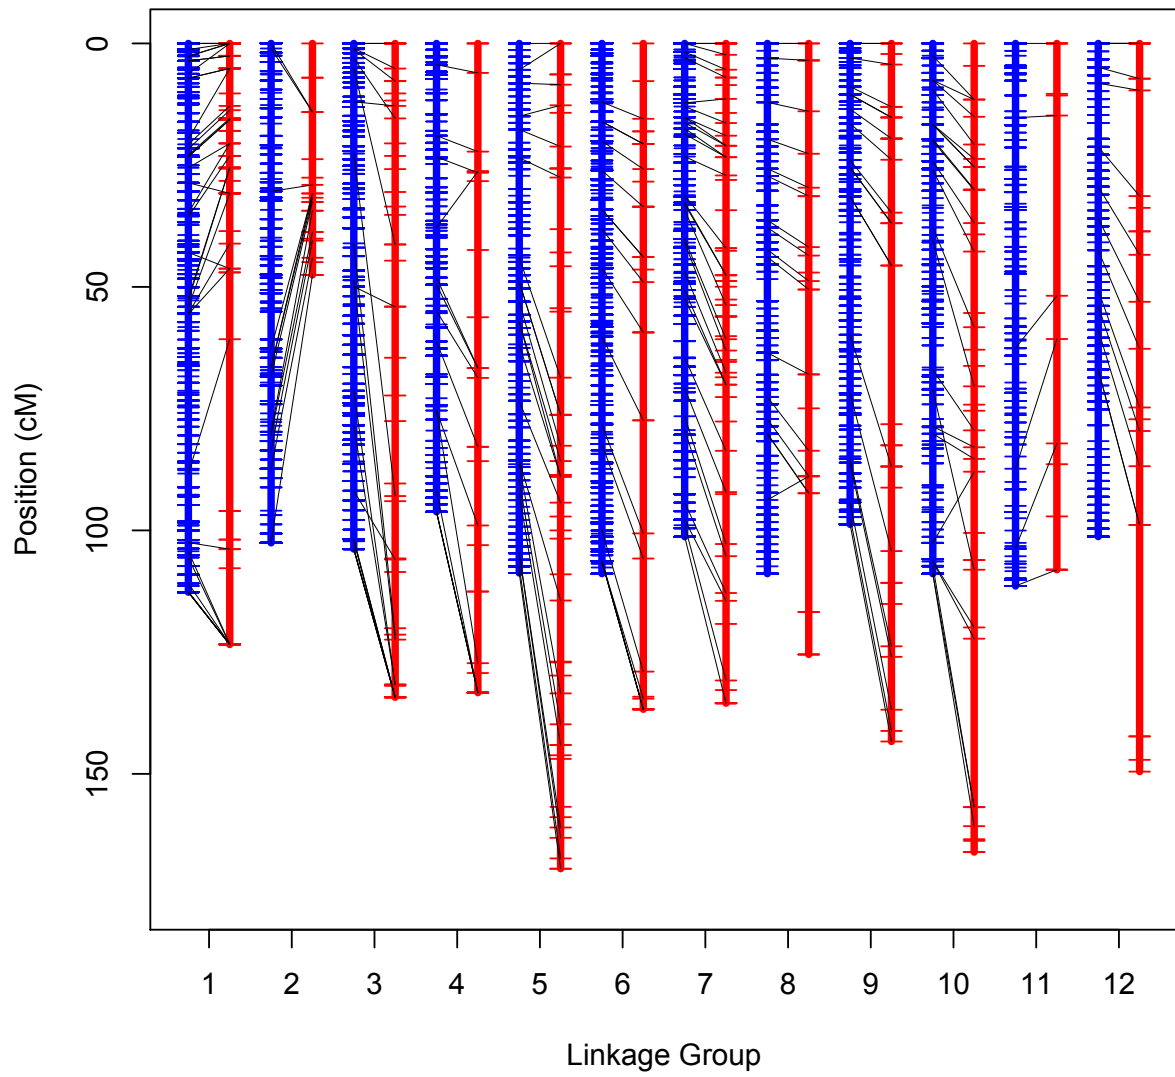

Fig. S8 Pairwise synteny plots between the blue (Klamath) and red (southern Sierra Nevada) maternal trees.

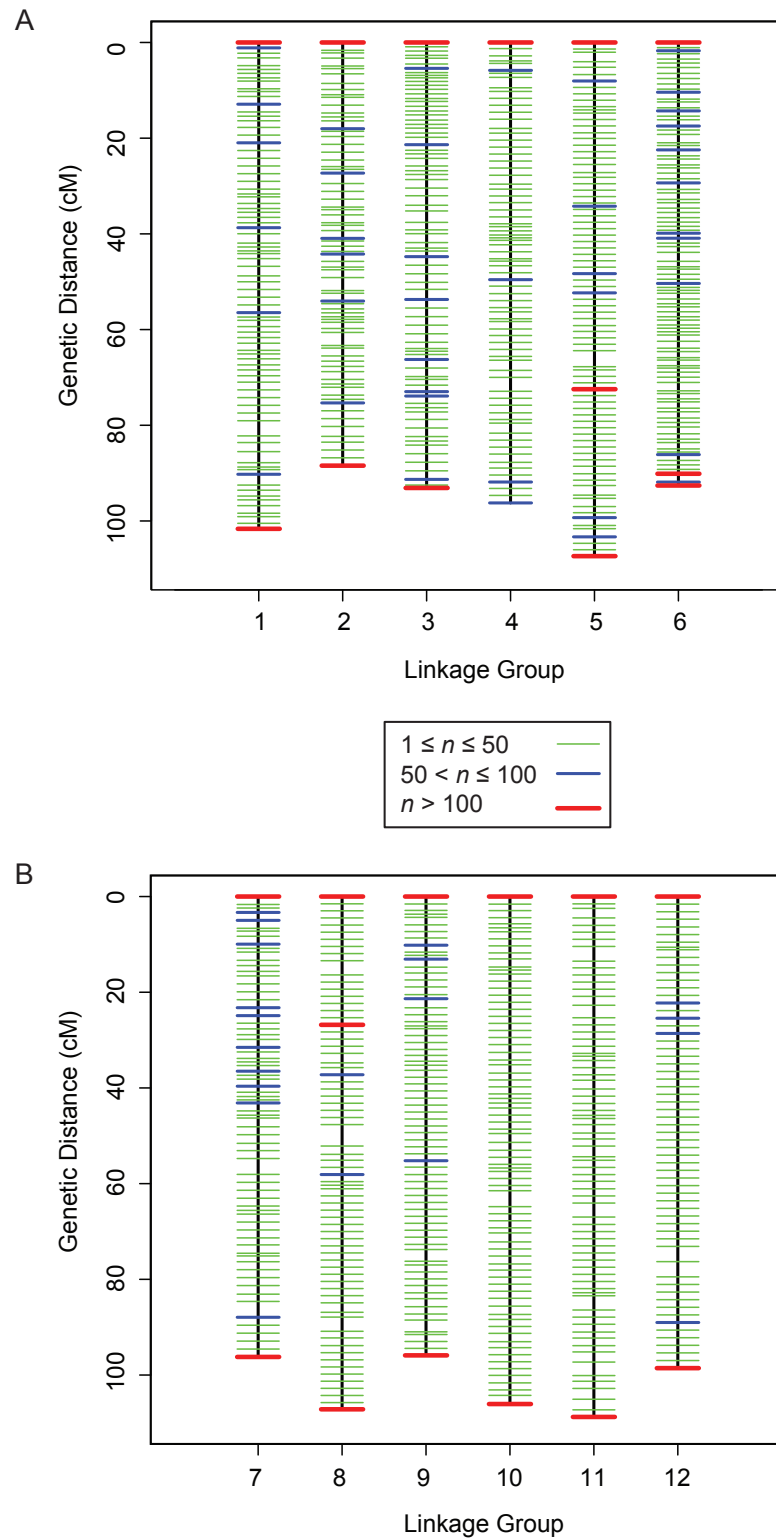

**Fig. S9** Consensus linkage map with positions colored by the number of contigs ( $n$ ) mapped to each position. (A) Linkage groups 1 to 6. (B) Linkage groups 7 to 12. Additional information is given in Figure 3 within the main manuscript.
